# Supplementary material for: Identification of Wheat Inflorescence Development-Related Genes Using a Comparative Transcriptomics Approach
Source: Hindawi journal article supplement (doi:10.1155/2018/6897032), 2018-01-01

IDG003-1A/1B/1D

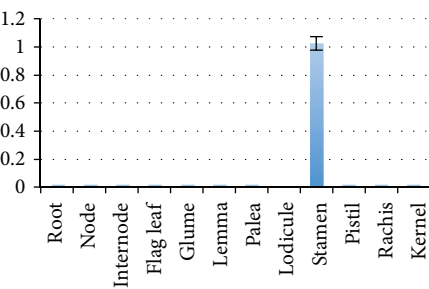

IDG004-1A/1B/1D

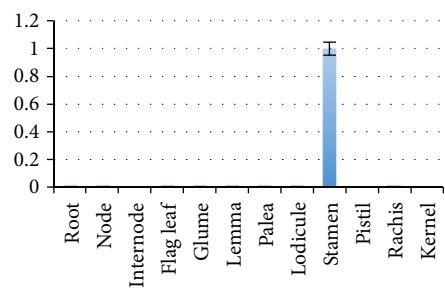

IDG006-1A/1B/1D

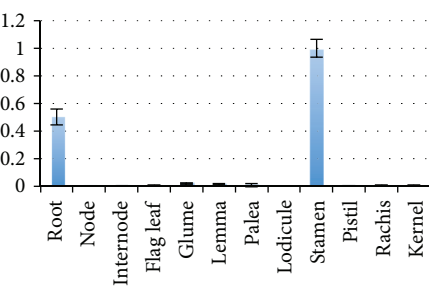

IDG007-1A/1B/1D

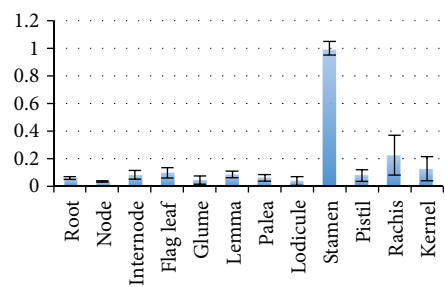

IDG008-1A/1B/1D

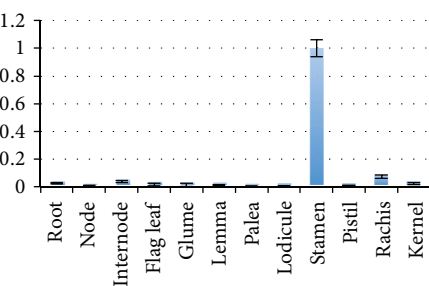

IDG015-2A/2D

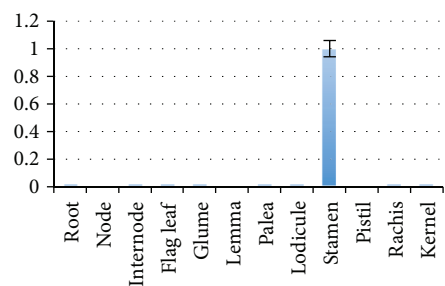

IDG018-2B/2D

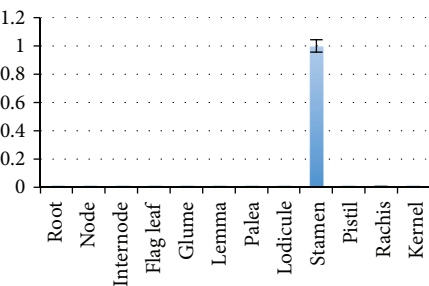

IDG021-3A/3B/3D

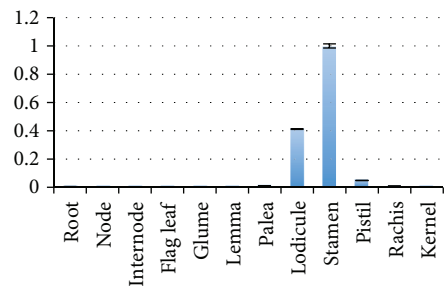

IDG024-3D

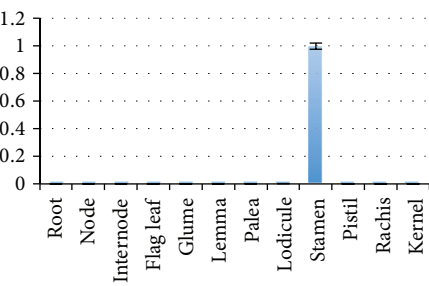

IDG030-3A/3B/3D

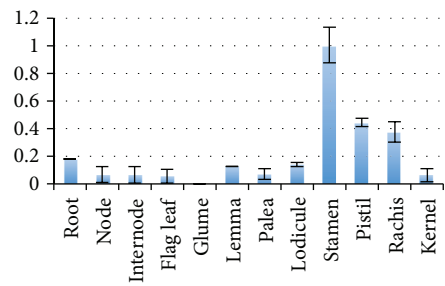

IDG042.1-6D

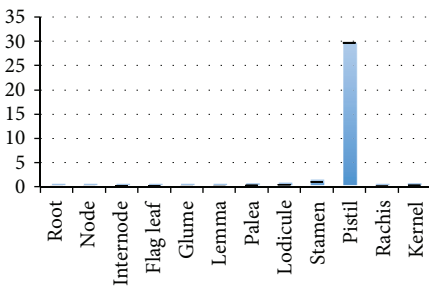

IDG043-6B/6D

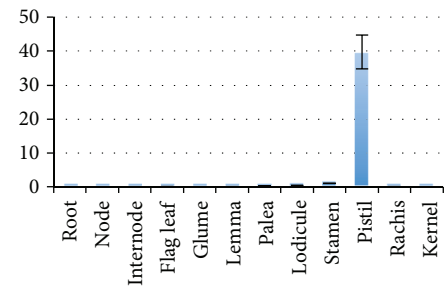

Supplement: f1 [file 6897032.f1.pdf]
