# Supplementary material for: Identification of Wheat Inflorescence Development-Related Genes Using a Comparative Transcriptomics Approach
Source: Int J Genomics. 2018 Feb 8;2018:6897032. doi: 10.1155/2018/6897032 (PMC5822904; doi:10.1155/2018/6897032)
Supplement: Supplementary 4 — Table S3: sequence, annotation, and expression specificity of 170 identified genes. ∗ and ∗∗ significantly different at P = 0.05 and 0.01, respectively. [file 6897032.f4.xlsx]

## Sheet: 170 identified genes
Table S3. Sequence, annotation and expression specificity of 170 identified genes. *and ** significantly different at P=0.05 and 0.01, respectively.
Gene_ID	Specificity based on ESTs	Specificity assigment based on RNA-seq	RES (inflorescence vs other vegetative tissues	RES (pistil or stamen vs vegetative tissues)	Annotation	ORF Sequence
IDG001-1A	spike predominant	stamen and pistil-predominant	0.66**	0.89**	MIKC-type MADS-box transcription factor WM14, a WPI-like protein	ATGGGGCGCGGCAAGATCGAGATCAAGAGGATCGAGAACTCGTCCAACCGCCAGGTGACCTTCGCCAAGCGCCGGGCCGGGCTGGTGAAGAAGGCCCGCGAGATCGGCGTGCTCTGCGACGCCGAGGTCGGCGTCGTCATCTTCTCCAGCGCCGGCAAGCTCTACGACTTCTGGACGCCCAAGACCACGCTACCGAGGATCTTGGAGAAGTACCAGACCAACTCCGGCAAGATCCTGTGGGACGAGAAGCACAAGAGCATCAGCGCAGAGATCGACAGGGTGAAGAAGGAGAACGACAACATGCAGATCGAGCTCAGGCATATGAAAGGCGAGGATGTGAACTCCCTGCAGCCCAAGGAACTGATCGCCATCGAGGAAGCTCTCACGAACGGCCAGACC…
IDG001-1B	spike predominant	stamen and pistil-predominant	0.70**	0.87**	MIKC-type MADS-box transcription factor WM14, a WPI-like protein	ATGGGGCGCGGCAAGATCGAGATCAAGAGGATCGAGAACTCGTCCAACCGCCAGGTGACCTTCGCCAAGCGCCGGGCCGGGCTGGTGAAGAAGGCCCGCGAGATCGGCGTGCTCTGCGACGCCGAGGTCGGCGTCGTCATCTTCTCCAGCGCCGGCAAGCTCTACGACTTCTGGACGCCCAAGACCACGCTGCCAAGGATCTTGGAGAAGTACCAGACCAACTCCGGGAAGATCCTGTGGGACGAGAAGCACAAGAGCATCAGCGCGGAGATTGACAGGGTGAAGAAGGAGAACGACAACATGCAGATCGAGCTCAGGCATATGAAAGGCGAGGATGTGAACTCGCTGCAGCCCAAGGAGCTGATCGCCATCGAGGAGGCGCTCACCAACGGCCAGACC…
IDG001-1D	spike predominant	stamen and pistil-predominant	0.26	0.76**	MIKC-type MADS-box transcription factor WM14, a WPI-like protein	ATGGGGCGCGGGAAGATCGAGATCAAGAGGATCGAGAACTCGTCCAACCGCCAGGTGACCTTCGCCAAGCGCCGGGCCGGGCTGGTGAAGAAGGCCCGCGAGATCGGCGTGCTCTGCGACGCCGAGGTCGGCGTCGTCATCTTCTCCAGCGCCGGCAAGCTCTACGACTTCTGGACGCCCAAGACCACGCTGCCGAGGATCTTGGAGAAGTACCAGACCAACTCCGGCAAGATCCTCTGGGATGAGAAGCACAAGAGCATCAGCGCCGAGATCGACAGGGTGAAGAAGGAGAACGACAACATGCAGATCGAGCTCAGGCATATGAAAGGCGAGGATGTGAACTCCCTGCAGCCCAAGGAGCTGATCGCCATCGAGGAGGCGCTCACCAACGGCCAGACC…
IDG002-1A	anther specific	stamen-specific	1.00**	1.00**	subtilisin-like protease	ATGCCCATACTTGCATGCTCTCGTAGATCGGTAGATGACATGGCTCACCTGACGGCACTACTCCTCGCGTCCGTTCTCGTCTTCGTCTTGAGCGCGACACCCACGCTGAGCATTATCACTGGCGGAGGCGGTGCGACAGCGAGGCAGAGTACCAGCCTCAACCATGGAGCCGCTCGAACTTACGTAGTGCTCGTCGAGCCTCCGGCGCACGCGCACCACGCCGACGAAGCCGCGCCCCGGAGATGGCACAAGTCGTTCCTGCGGCCGGGGTCGCGCCCTGGCAGGACGGCCGGCGGCGACGCACCGACCATTCGCCACTCGTACACGGGCGTGTTTTCCGGCTTCGCCGCAAAGCTGACGGAGGACGAGCTCGCAGCGGTGTCCAGGAAGCGCGGGTTC…
IDG002-1B	anther specific	stamen-specific	1.00**	1.00**	subtilisin-like protease	ATGCCCATGCTTGCATGCTCTCGTAGATCGGTAGATGACATGGCTCACCTGACGGCACTACTCCTCGCGTCCGTTCTCGTCTTCGTCTTGAGCGCGACACCCACGCTAAGCATTATCACTGGCGGAGGCGGTGCGACAGCGAGGCAGAGTACCAGCCTCAACCATGGCGCCGCTCGAACTTACGTAGTGCTCGTCGAGCCTCCGGCGCACGCGCACCACGACGACGAAGCCGCGCACCGGAGATGGCATGAGTCGTTCCTGCGGACGGGGTCGCGCCCTGGCAGGAAGGCCGGCGGCGAAGCACCCACCATTCGCCACTCGTACACGGGCGTGTTTTCCGGCTTCGCCGCAAAGCTGACGGAGGACGAGCTCGCAGCGGTGTCCAGGAAGCGCGGGTTC…
IDG002-1D	anther specific	stamen-specific	0.99**	1.00**	subtilisin-like protease	ATGCCCATGCTTGCATGCTCTCGTAGATCGGTAGATGACATGGCTCACCTGACGGCACTACTCCTCGCGTCCGTTCTCGTCTTCGTCTTGAGTGCGACACCCACGCTGAGCATTATCACTGGCGGAGGCGGTGCGACAGCGAGGCAGAGTACCAGCCTCAACCATGGCGCCGCTCGAACTTACGTAGTGCTCGTCGAGCCTCCGGCGCACGCGCACCACGCCGACGAAGCCGCGCACCGGAGATGGCACGAGTCGTTCCTGCGGCCGGGGTCGCGCCCTGGCAGGACGGCCGGCGGCGACGCGCCGACCATTCGCCACTCGTACACGGGCGTGTTTTCCGGCTTCGCCGCAAAGCTGACGGAGGACGAGCTCGCAGCGGTGTCCAGGAAGCGCGGGTTC…
IDG003-1A	anther specific	stamen-specific	0.99*	1.00**	gibberellin-regulated protein Ⅱ-like	ATGGCCGGCCAAGCTAGGGCGTTCATGTGCGTGGCGCTCGTCGTCCTCCTGCTCCTCGTCGAGACCACCGCCCCGAGTGGACAAGCTCACGCCGTCGATTGCGGCAGCGCGTGCTCGTACCGGTGCAGCAAGTCGAGCCGGCCGAATTTGTGCAACAGGGCGTGCAACACGTGCTGCCGGCGATGCGACTGCGTGCCGCCCGGCACCGCCGGCAACGAGGACGTCTGCCCCTGCTACGCCCACATGACCACGCACGACGGCCGCCACAAGTGCCCATGA
IDG003-1B	anther specific	stamen-specific	0.97	1.00**	gibberellin-regulated protein Ⅱ-like	ATGGCCGGCAAAGCTAGGGTGTTCATGTGCGTGGCGCTCGTCGTCCTCCTGCTCCTTGTCGAGACCACCGCCCCGACTGGACAAGCTCACGCCGTCGATTGCGGCGGCGCGTGCTCGTACCGGTGCAGCAAGTCGAGTCGACCGAATCTGTGCAACAGGGCGTGCAACACGTGCTGCCGGCGATGCAACTGCGTGCCGCCCGGCACCGCCGGCAACGAGGACGTCTGCCCCTGCTACGCCCACATGACCACGCACGACGGCCGCCACAAGTGCCCATGA
IDG003-1D	anther specific	stamen-specific	0.82	1.00**	gibberellin-regulated protein Ⅱ-like	ATGGCCGGCAAAGCTAGGGTGTTCATGTGCGTGGCGCTCGTCGTCCTCCTGCTCCTTGTCGAGACCACCGCTCCGAGTGGACAAGCTCACGCCGTCGATTGCGGCAGCGCGTGCTCGTACCGGTGCAGCAAGTCGAGCCGGCCGAATCTGTGCAACAGGGCGTGCAACACGTGCTGCCGGCGATGCGACTGCGTGCCGCCCGGCACCGCCGGCAACGAGGACGTCTGCCCCTGCTACGCCCACATGACCACGCACGACGGCCGCCACAAGTGCCCATGA
IDG004-1A	anther specific	stamen-specific	0.92	1.00**	anther-specific protein RTS-like	ATGGCTACCACCAGTCATGCCCTCCTCATCGCCCTCGTCGTCCTCGCCGGCCTCGCCGACCTGCAGGCCGCCGCGGGGCCCGTTCACGCCGCGGAGCACTCCGCGGCGGCGGCAATGGCGACGGCGTACCCAATGGCGGACGAGGCGGATCCGGACCTGAACGGGATGATGCAGTGCATGTTCGGGTGCTTCACGTCGGTGATGAGCTGCGCGTTCGGGTGCATGGGCAAGGGCCCCGACCTGCCGCTCTGCGTCATCAGCTGCAACCAGAAGAGCATCGTCTGCATGATCCGCTGCGGCCTCACGCCCTCGCCGCCGAGCCCCAAGCCGCCAACGCCACCCGGGCCCAAGCCGGCGCCCCCCAAGCCTGCACCCGGCCCGCCGCCATACGCCCGTCAA…
IDG004-1B	anther specific	stamen-specific	1.00*	1.00**	anther-specific protein RTS-like	ATGGCTACCACCAGCTGTGCCCTCCTCATCGCCCTCGTCCTCTTCGCCGGCCTCGCCGACCTGCAGGCCGCCGCAGCGGCCGCGAGGCCCGTTCACGCCACGGAGCACTCCTCCGTGGCGGCGATGACGGCGGAGCACCCAATGGCGGACGAGGCGGATCCGGACCTGAACGGGATGATGCAGTGCATGTTCGGGTGCTTCACGTCGGTGATGAGCTGCGCGTTCGGGTGCATGGGCAAGGGCCCCGACCTGCCGCTCTGCATCATCAGCTGCAACCAGAAGAGCATCGTCTGCATGATCCGCTGCGGCCTCACGCCCTCGCCGCCGAGCCCCAAGCCGCCAACGCCACCGGCGCCGCCCGCGCCCAAGCCGGCACCCCCCAAGCCTGCACCCGGCCCG…
IDG004-1D	anther specific	stamen-specific	1.00**	1.00**	anther-specific protein RTS-like	ATGGCTACCACCAGCTGTGCCCTCCTCGTCGCCCTCGTCGTCCTGGCCGGCCTCGCCGACCTGCAGGCCGCCGCAGCCGCCCCGAGGCCCGTTCACGCCGCGGAGCACTTCTCCATGGCGGCAATGACGGCGGAGCACCCAATGGCGGACGAGGCGGACCCGGACCTGAACGGGATGATGCAGTGCATGTTCGGGTGCTTCACGTCGGTGATGAGCTGCGCGTTCGGGTGCATGGGCAAGGGCCCCGACCTGCCGCTCTGCGTCATCAGCTGCAACCAGAAGAGCATCGTCTGCATGATCCGCTGCGGCCTCACGCCCTCGCCGCCGGCTCCCAAGCCGCCAACGCCACCCGGGCCGCCCGCACCCAAGCCGGCACCCCCCAAGCCTGCACCCGGCCCG…
IDG005-1A	spike specific	inflorescence specific (spike_Z65)	1.00**	/	cysteine protease-like protein.	ATGGCTTTGTCCCCCGGCGCATGGCCGGCGATCACTGCAATCTTGCTGGTGCACGGCCTGTTCGCCGCCTTCCCGGCGGTGTCGGTCGACATGGGCGACATGCTGATGATGGACAGGTTCCGCGAGTGGCAAGTCACGCACAACCGGACGTACCTGAGCACGGAGGAGAGGGTGCATCGCTTTCAGGTGTACCGCGACAACGTGGAGTACATCGATGCCACCAACCGGCGTGGTGACCTCACCTACGAGCTCGGCGAGAACGAGTTCCTGGCTAGGTACGCGTCGTCCTACGAAGCTGCCAGCGATGATACGGGCATTACTTTGCCTGTGGGCGGCGGCGACGCCGAGCTGTGGTCATCCGGCGTCAACGATGGTAGCTCCTTGGAGGCTCCGCCTCCC…
IDG005-1B	spike specific	inflorescence specific (spike_Z65)	1.00**	/	cysteine protease-like protein.	ATGGCCTTCTCCCGTGGCGCATGGCCGGCCATCACTGCAATCTTGCTGGTGCGCGGCCTGTTCGCCGCCTTCCCGGCGGCGTCGGTCGACATGGGCGACATGCTGATGATGGACAGGTTCCGCCAGTGGCAGGCCACGCACAACCGGACGTACCTGAGCACGGAGGAGAGGCTGCGTCGCTTCCAGGTGTACCGCGACAACGTGGAGTACATCGAGGCCACCAACCGGCGCGGCGACCTCACCTACGAGCTCGGCGAGAATGAGTTCGCCGACCTCACCCAGGAGGAGTTCCTGGCTAGGTACGCGTCGTCCTACGACGCTGCCGGTGATGATACAGGCATTACGTTGCCTGTGGGCGGCGGCGACGCCGAGCTGTGGTCGTCCGGCGGCGACGATGGT…
IDG005-1D	spike specific	inflorescence specific (spike_Z65)	1.00**	/	cysteine protease-like protein.	ATGGCTTTGTCCCCCGGCGCATGGCCGGCGATCACTGCAATCTTGCTGGTGCGCGGCCTGTTCGCCGCCCTCCCGGCGGCGTCGGTCGACATGGGCGACATGCTGATGATGGACAGGTTCCGTCAATGGCAGGCCACGCACAACCGGTCGTACCTGAGCGCGGAGGAGAGGCTGCGTCGCTTCCGGGTGTACCGCGACAACGTGGAGTACATCGACGCCACCAACCGGCGCGGCGACCTCACCTACGAGCTCGGCGAGAATGAGTTCGCCGACCTCACCCAGGAGGAGTTCCTAGCCAGGTACGCGTCGTCCTACGATGGGGTCGGTGATGATACTGGCATCACGTTGCCTGTGGGCGGTGGCGACGCCGAGCTGTGGTCGTCCGGCGGCGACAATGAT…
IDG006-1A	anther specific	stamen-specific	0.99**	1.00**	hexosyltransferase, a type of glycosyltransferase that catalyze the transfer of a hexose, putative beta-1,3-galactosyltransferase	ATGATGGCGCTGAGCGAGAGGCAGCCCCAGTCGGAGAAGAAGGCCCCCCGGGCGAGGCCCATGTCGGGAAAGGCCGTCTTCGTGCTCTGCGCCACCAGCTTCTTCGTGGGGCTGCTGCTCAGCGGCCGGATGACGGTGCTGACGCCGCCGGCGTCGGGCAGCCACGGCGGCTCCAGGATCGCCCTCTTCTCCGACGACGACTGCGAGCACATGCGTAAGCTGGAAGAAGAGAGCAACCCGAACGATGTCATGAACGAGGTGACACGAACCCACCAAGCCATTCGGTCTCTTGACAAGTCGGTGTCGTCGCTGGAGATGGAGCTGGCGGTGGAGCGCGCCAAGAGGAACGGCGGCCTGGGCGCGGCGGTGCCGTCCAAGGGCCTCCCGAAGGTGTTCGTG…
IDG006-1B	anther specific	stamen-specific	1.00**	1.00**	hexosyltransferase, a type of glycosyltransferase that catalyze the transfer of a hexose, putative beta-1,3-galactosyltransferase	ATGATGGCGCTGAGCGAGAGGCAGCCGCAGTCGGAGAAGAAGGCCCCGCGGGCGAGGCCCATGTCGGCGAAGGCGGTCTTCGTGCTGTGCGCCACCAGCTTCTTCGTGGGGCTGCTGCTCAGCGGCCGGATGACGGTACTGTCTCCCCCGGCGTCGGGCAGCCACGGCGGCTCGAGGATCGCCCTCTTCTCCGACGACGACTGCGAGCACAGGCGTAAGCTGGAAGAAGAGAGCAACCCGAACGATGTCATGAACGAGGTGTCACGAACCCACCAAGCCATTCGGTCTCTGGACAAGTCTGTGTCGTCGCTGGAGATGGAGCTGGCGGTGGAGCGCGCCAAGAGGAACGGCGGCCTGGGCGCGGCCGTGCCGTCCAAGGGCCTCCCGAAGGTGTTCGTG…
IDG006-1D	anther specific	stamen-specific	1.00**	1.00**	hexosyltransferase, a type of glycosyltransferase that catalyze the transfer of a hexose, putative beta-1,3-galactosyltransferase	ATGATGGCGCTGAGCGAGAGGCAGCCGCAGTCGGAGAAGAAGGCCCCGCGGGCGAGGCCCATGTCGGGGAAGGCCGTGTTCGTGCTCTGCGCCACCAGCTTCTTCGTGGGGCTGCTGCTCAGCGGCCGGATGACGGTACTGACGCCGCCGGCGTCGGGCGGCCACGGCGGCTCCAGGATCGCCCTATTCTCCGACGACGACTGCGAGCACAGGCGTAAGCTGGAAGAAGAGAGCAACCCGAACGATGTCATGAACGAGGTGTCACGAACCCACCAAGCCATTCGGTCTCTGGACAAGTCGGTGTCGTCGCTGGAGATGGAGCTGGCGGTGGAGCGGGCCAAGAGGAACGGCGGCCTGGGCGCGGCGGTGCCGTCCAAGGGCCTCCCGAAGGTGTTCGTG…
IDG007-1A	anther specific	stamen-specific	1.00**	1.00**	protease inhibitor/seed storage/LTP family protein-like	ATGTCTCAGCTCGCCCGCGCCAGCCTGACTGCGGTGGCGATGTTCCTTCTCCTTGCCGCCGCAGCAGCGGCGGGGCCGGCGGGCTGCCAGGACGACGTTGTGGCGCTCAACGAGGCCTGCTACCAGTACGTGCAGAAGGGCGCGCCGACGGTGCCGCCGTCGCAGGAGTGCTGCGACGCCGTGAAGAGCGTGGACGTGCCCTGCGTCTGCAGCTACCTGGGCAGCCCCGGCGTGCGGGACAACATCAGCATGGAGAAGGTGTTCTACGTCTCCCAGCAGTGCGGCGTCAGCATCCCTGGCAACTGCGGAGGATCGATGGTCTGA
IDG007-1B	anther specific	stamen-specific	1.00**	1.00**	protease inhibitor/seed storage/LTP family protein-like	ATGTCTCAGCTCGCCCGCGCTAGCCTGACTGCGGTGGCGATGCTCCTCCTCCTTGCCGCTGCTGCGGCGGCGGAGGGGCCAGCAGGCTGCCAGGACGACGTTGTGGCGCTCAACGAGGCCTGCTACCAGTACGTGCAGAAGGGCGCGCCGACGGTGCCGCCGTCGCAGGAGTGCTGCGACGCCGTGCGGCGCGTGGACGTGCCCTGCGTCTGCAGCTACCTGGGCAGCCCCGGCGTGAGGGACAACATCAGCATGGAGAAGGTGTTCTACGTCTCCCAGCAGTGCGGCGTCAGCATCCCTGGCAACTGCGGAGGATCGAAGGTCTGA
IDG007-1D	anther specific	stamen-specific	1.00**	1.00**	protease inhibitor/seed storage/LTP family protein-like	ATGTCTCAGCTCGCCCGCGCCAGCCTGACTGCGATGGCGATGCTCCTTCTCCTTGCCGCTGCTGCGGCGGCGGCGGGGCCGGCGGCCGGCGGCGCGGCTGTGGCGGACCCAGCAGGCTGCCAGGACGACGTTGTGGCGCTCAACGAGGCCTGCTACAAGTACGTGCAGAAGGGCGCGCCGACGGTGCCGCCGTCGCAGGAGTGCTGCGACGCCGTGAAGAGCGTGGACGTGCCCTGCGTCTGCAGCTACCTGGGCAGCCCCGGCGTGAGGGACAACATCAGCATGGAGAAGGTGTTCTACGTCTCCCAGCAGTGCGGCGTCAGCATCCCTGGGAACTGCGGAGGATCGAAGGTCTGA
IDG008-1A	spike specific	inflorescence specific (spike_Z39)	1.00**	1.00**	chalcone synthase-like.	ATGTCTGGCCTTGGTGGAGTCGGGAGCATTGGCGGAGGCGGCAACGGCAGAAGCCAAGGCTTGGGGGGCAAGGCCAAGCTGCTCGCGCTCGGCAAGGGACTCCCTGAACAAGTTCTACCCCAGGAGAAGCTCGTGGAGACCTACCTCCAGGACACCAGCTGCGACGATCCCGCCACCAGGGCCAAGCTCGAACGCCTCTGCAAGACCACAACAGTGAGGACAAGGTACACTGTCATGTCGAAGGAGCTCCTGGATGAACACCCAGAATTGAAGACAGAAGGCACTCCAACATTGACGCCACGGCTTGACATCTGCAATGCCGCGGTGCTTGAACTTGGTGCTGCTGCAGCTCGTGCCGCCCTTGGTGAGTGGGGCCGTCCGGCAGCTGATATTACCCAC…
IDG008-1B	spike specific	inflorescence specific (spike_Z39)	1.00**	0.99**	chalcone synthase-like.	ATGTCTGGCCTTGGTGGACTCGGGAGCGTCGGCGGGGGCAGCAACGGCAGAAGCCATGGCTCGGGGGGCAAGGCCAAGCTGCTCGCGCTCGGCAAGGGTCTCCCTGAGCAAGTTCTACCCCAGGAGAAGCTCGTCGAGACCTACCTCCAGGACACCAGCTGCGACGATCCCGCCACCAGGGCCAAGCTCGAGCGCCTCTGCAAGACCACAACAGTGAGGACAAGGTACACTGTCATGTCGAAGGAGCTCCTGGATGAACACCCAGAATTGAAGACAGAAGGCACTCCAACATTGACACCACGGCTTGACATCTGCAATGCCGCGGTGCTTGAACTTGGTGCTGCTGCAGCTCGTGCCGCCCTTGGTGAGTGGGGCCGTCCAGCAGCTGATATTACCCAC…
IDG008-1D	spike specific	inflorescence specific (spike_Z39)	1.00**	1.00**	chalcone synthase-like.	ATGTCTGGCCTTGGTGGACTCGGGAGCATCGGCGGGGGCGGCAACGGCATAAGCCACGGCTCGGGGGGCAAGGCCAAGCTGCTCGCACTCGGCAAGGGTCTCCCTGAACAAGTTCTACCCCAGGAGAAGCTCGTCGAGACCTACCTCCAGGACACCAGCTGCGACGATCCCGCCACCAGGGCCAAGCTCGAACGCCTCTGCAAGACCACAACAGTGAGGACAAGGTACACTGTCATGTCGAAGGAGCTCCTGGATGAATACCCAGAATTGAAGACAGAAGGCTCTCCAACATTGACGCCACGGCTTGACATCTGCAATGCCGCGGTGCTTGAACTTGGTGCTGCTGCAGCTCGTGCCGCCCTTGGTGAGTGGGGCCGTCCAGCAGCTGATATTACCCAC…
IDG009-1A	anther predominant	stamen-predominant	-0.39	0.26**	phosphoethanolamine N-methyltransferase	ATGGACACCATCACCGTCGTGGAGAATGTGTTCGGGGAGGTGGAGCGCAAGGTGCAGAAGAGCTACTGGGAGGAGCACTCCAAGGACCTCACCGTGGAGTCCATGATGCTCGACTCCCGCGCCAAGGACCTCGACAAGGAGGAGAGGCCCGAGGTGCTGGCCATCCTGCCGTCGTACGCGGGCAAGACGGTGCTGGAGCTCGGCGCCGGCATCGGCCGCTTCACCGGCGAGCTGGCCAAGGAGGCCGGCCACGTCATCGCGCTCGACTTCATCGACAGCGTCATCAAGAAGAACGAGGAGATCAATGGGGACATCTACAAGAACATCACTTTCATGTGCGCCGACGTGACCTCGCCGGAGCTCAAGATCGAGGACAACTCCATCGACATCGTCTTCTCC…
IDG009-1B	anther predominant	stamen-predominant	-0.09	0.54**	phosphoethanolamine N-methyltransferase	ATGGACACCATCACCGTCGTCGAGAATGTGTTCGGGGAGGTGGAGCGCAAGGTGCAGAAGAGCTACTGGGAGGAGCACTCCAAGGACCTCACCGTGGAGTCCATGATGCTCGACTCCCGCGCCAAGGACCTCGACAAGGAGGAGAGGCCAGAGGTGCTGGCCATCCTGCCGTCGTACGCGGGGAAGACGGTGCTGGAGCTCGGCGCCGGCATCGGCCGCTTCACCGGCGAGCTGGCCAAGGAGGCCGGCCACGTCATCGCGCTCGACTTCATCGACAGCGTCATCAAGAAGAACGAGGAGATCAATGGGGACATCTACAAGAACATCACCTTCATGTGCGCCGACGTCACCTCGCCGGAGCTCAAGATCGAGGACAACTCCATTGACATCGTCTTCTCC…
IDG009-1D	anther predominant	stamen-predominant	-0.95	0.20**	phosphoethanolamine N-methyltransferase	ATGGACACCATCACCGTCGTCGAGAATGTGTTCGGGGAGGTGGAGCGCAAGGTGCAGAAGAGCTACTGGGAGGAGCACTCCAAGGACCTCACCGTGGAGTCCATGATGCTCGACTCCCGCGCCAAGGACCTCGACAAGGAGGAGAGGCCTGAGGTGCTGGCCATCCTCCCGTCGTACGCGGGCAAGACGGTGCTGGAGCTCGGCGCCGGCATCGGCCGCTTCACCGGCGAGCTGGCCAAGGAGGCCGGCCACGTCATCGCGCTCGACTTCATCGACAGCGTCATCAAGAAGAACGAGGAGATCAATGGGGACATCTACAAGAACATCACCTTCATGTGCGCCGACGTCACCTCGCCGGAGCTCAAGATCGAGGACAACTCCGTCGACATCGTCTTCTCC…
IDG010-1A	spike predominant	stamen-predominant	0.62**	0.65**	long chain acyl-CoA synthetase	ATGGAAGGGACAAAGAAGCAGGTTTTCACGATCCAGGTGGAGGATGGAAAGCCTGGGAAGGATGGCCAGCCGGCGGTGGGGCCAGTGTTCCGGAACATACTGGCCAAGGATGGGTTCCCGCCGCTCGATCCTGACATGAGAACCTCATGGGATGTGTTCAGAACAGCAGCAGGGAAGTATCCAGATAACCGGATGCTTGGATGGCGTCCATTTAAAGATGGAGTGCCAGGGCCCTACTTATGGAAATCATACAAGGAGGTCTATGAGGAAGTCCTGCAAATTGGATCTGCGCTGCAGCAGCTGGGGGTGCAACCAGGTTCCAGGGTTGGAATTTATGGATCCAACTGCCCTCAATGGGTGGTAGCAATGCAGGCTTGCAATGGTTACAGCATAATATGT…
IDG010-1B	spike predominant	stamen-predominant	-0.06	0.68**	long chain acyl-CoA synthetase	ATGGAGGGGGCAAAGAAGCAGGTTTTCACGATCAAGGTGGAGGATGGGAAGCCCGGGAAGGACGGCCGGCCGGCGGTGGGGCCGGTGTTCCGGAACATACTGGCCAAGGATGGGTTCCCGCCGCTTGATCCTGACATGAGGACCTCATGGGATGTGTTCAGAACGGCAGCAGGCAAGTATCCAGACAACCGGATGCTTGGATGGCGTCCATTTAAAGACGGAGTGCCAGGGCCCTACTTATGGAAATCATACAAGGAGGTCTATGAGGAAGTCCTGCAAATTGGATCTGCGCTGCAGCAGCTGGGGGTGCAACCAGGTTCCAGGGTTGGAATTTATGGATCCAACTGCCCTCAATGGGTGGTAGCAATGCAGGCTTGCAATGGTTACAGCATAATATGT…
IDG010-1D	spike predominant	stamen-predominant	0.63**	0.64**	long chain acyl-CoA synthetase	ATGGAGGGGGCAAAGAAGCAGGTTTTCACGATCCAGGTGGAGGATGGAAAGCCCGGGAAGGATGGCCGGCCGGCGGTGGGGCCGGTGTTCCGGAACATACTGGCCAAGGATGGGTTCCCGCCGCTTGATCCTGACATGAGGACCTCATGGGATGTGTTCAGAACGGCAGCAGGCAAGTATCCAGACAACCGGATGCTTGGATGGCGTCCATTTAAAGATGGAGTGCCAGGGCCCTACTTATGGAAATCATACAAGGAGGTCTATGAGGAAGTCCTGCAAATTGGATCTGCGCTGCAGCAGCTCGGGGTGCAACCAGGTTCCAGGGTTGGAATTTATGGATCCAACTGCCCTCAATGGGTGGTAGCAATGCAGGCTTGCAATGGTTACAGCATAATATGT…
IDG011-1A	spike predominant	stamen and pistil-predominant	0.55**	0.44**	histone H2A	ATGGCCGGGAAAGGAGGCAAGGGGCTGCTTGCGGCGAAGACGACGGCGGCCAAGGGCGCCGCCGACAAGGACAAGGACAAGAAGAAGGCGCCCGTGTCCCGCTCCTCCCGCGCCGGGATTCAGTTCCCGGTGGGACGTATACACAGGCAGCTCAAGCAGAGGGTCTCGGCTAATGGCCGTGTGGGTGCCACTGCTGCTGTGTACTCTGCAGCAATCCTTGAGTACCTTACTGCCGAGGTCCTTGAGCTGGCCGGCAACGCTAGCAAGGATCTCAAGGTGAAGCGTATCACCCCTCGCCACCTGCAGCTTGCGATCCGTGGAGATGAGGAGCTGGACACCCTCATCAAGGGCACCATCGCTGGTGGTGGTGTCATCCCTCACATCCACAAGTCACTCATC…
IDG012-1B	spike predominant	stamen and pistil-predominant	0.49**	0.59**	histone H2A	ATGGCCCCCAAGGCGGAGAAGAAGCCGGCGGCGAAGAAGCCCGCGGAGGAGGAGCCGACGACGGAGAAGGCCGAGAAGGCCCCGGCGGCGAAGAAGCCCAAGGCCGAGAAGCGGCTGCCGGCGGGCAAGACCGCCTCCAAGGAGGGCGGCGAGAAGAGGGGCCGCAAGAAGGGCAAGAAGAGCGTGGAGACGTACAAGATCTACATCTTCAAGGTGCTCAAGCAGGTCCACCCCGACATCGGCATCTCCTCCAAGGCCATGTCCATCATGAACTCCTTCATCAACGACATCTTCGAGAAGCTCGCCGGCGAGGCCGCCAAGCTCGCCCGCTACAACAAGAAGCCCACCATCACCTCCCGGGAGATCCAGACCTCCGTCCGCCTCGTCCTCCCCGGCGAG…
IDG012-1D	spike predominant	stamen and pistil-predominant	0.50**	0.66**	histone H2A	ATGGCCCCCAAGGCGGAGAAGAAGCTGGCGGCGAAGAAGCCCGCGGAGGAGGAGCCGACGACGGAGAAGGCCGAGAAGGCCCCGGCGGCCAAGAAGCCCAAGGCCGAGAAGCGGCTGCCGGCGGGCAAGACCGCCTCCAAGGAGGGCGGCGAGAAGAGGGGCCGGAAGAAGGGCAAGAAGAGCGTCGAGACGTACAAGATCTACATCTTCAAGGTGCTCAAGCAGGTGCACCCCGACATCGGCATCTCCTCCAAGGCCATGTCCATCATGAACTCCTTCATCAACGACATCTTCGAGAAGCTCGCCGGCGAGGCCGCCAAGCTCGCCCGCTACAACAAGAAGCCCACCATCACCTCCCGGGAGATCCAGACCTCCGTCCGCCTCGTCCTCCCCGGCGAG…
IDG013-1B	anther specific	stamen-specific	1	1.00**	triacylglycerol lipase	ATGTCGGAGCCATGGCGCCTCGTTGGACCGATCACGGCCACGGCGGCGGCGAGGTGGAAGGAGCTCCACGGCGAGCGGTCGTGGGACGGGCTGCTGCGGCCGCTGGACCTGGACCTCCGGCGCACGCTGATCTGGTACGGCGAGATGGCGCAGGCCACGTACGACGCGTTCAACTACGAGAAGCACTCGCCGCACGCCGGCCTCTCACGCTTCGGCAGGAAGCGCTTCTTCGAGCGCGTGATGCTGCCGGGCCACGCCGCCGCGTACCGGATCACCAGGTTCCTGTACGCCACGTCCTCCGCCCCCGCCGCGCCGGCCGCCGCGTTCGTCAGGAGCCGCCACCCGCGGCGCCGGTGCAAGGAGTCCAACTGGATCGGGTACGCCGCGGTGGCCACGGAC…
IDG014-2A	spike specific	inflorescence specific (spike_Z65)	0.99**	/	nitrate-induced NOI protein	ATGGCGAACAACCCCACGAAATCCGGACACTACGCGCAGAACAAGGGCCGGTCGCTGCCCAAGTTCGGGGAGTGGGACGTGAAGAACCCGGCCACGGCCGACGGCTTCACCGTCATATTCCAGCGAGCCCGCGACGACAAGAAGACGACCGCTGGCCCCGGGAGGCCGGGCATCCCGCCGGCCTTCAGGAACGCCGACGGCGGCAACGGCACCATCAAAACCGGCAACGGCTACCCGTACGCCAGGGTGGCTACACCCAAACGGTCCAAGAAGAAGAGCTGGTTCTCCTGCACCAGTTGCCGATTCTGA
IDG014-2B	spike predominant	inflorescence specific (spike_Z65)	0.99**	/	nitrate-induced NOI protein	ATGGCGAACAACCCCACGAAATCCGGACACTACGCGCAGAACAAGGGCCGGTCGCTGCCCAAGTTCGGGGAGTGGGACGTGAAGAACCCGGCGACGGCCGACGGCTTCACCGTCATATTCCAGAGAGCCCGCGACGACAAGAAGACGACCGCCGGCCCCGGGAGGCCGGGCATCCCGCCGGCATTCAGGAACGCCGACGGCCGCTACGGCACCATCAAAACCGGCAACGGCTACCCGTACGCCAGGGTGGCGACACCCAAACGGTCCAAGAAGAAGAGTTGGTTCTCCTGCACCAGCTGCCGATTCTGA
IDG014-2D	spike specific	inflorescence specific (spike_Z65)	0.99**	/	nitrate-induced NOI protein	ATGGCGAACAACCCCACGAAATCCGGACACTACGCGCAGAACAAGGGCCGGTCGCTGCCCAAGTTCGGGGAGTGGGACGTGAAGAACCCGGCCACGGCCGACGGCTTCACCGTCATATTCCAGAGAGCCCGCGACGACAAGAAGACGACCACTGGCCCCGGGAGGCCGGGCATCCCGCCGGCCTTGAGGAACGCCGACGGCCGCTACGGCACCATCAAAACCGGCAACGGCTACCAGTACGCCAGGGTGGCGACACCCAAACGGTCCAAGAAGAAGAGCTGGTTCTCCTGCACCAGCTGCCGATTCTGA
IDG015-2A	anther specific	stamen-specific	1.00**	1.00**	uncharacterized protein	ATGGCCGCCGCCGGGAACCCCATCGGTGGCGTCCTGCTGCTTCTGCTGCTCGTAGCCGCCTTCATGTCCACCGCCGAAGGCAGAATCAAGGGGGTCGTCCGAGCGCCCTTGGCGTCTGTCGCACCAGCACCAGGCGCCGGCGAGCGTGACATGGGAGGCGAGCGCGTGCCCACGCACTCCGTCGTGGACTGTTTCATGGGCTGCGTCAGCATGGCGGAGGATTGTGGGGGCTTTTGCATGGACAAGCCGCTCGACGAAGCGAACGACTGCATGACGGAATGCCTCACCGCTGACCTCTCCTGCCTCACCGGCTGCGGCCCGGCACTCGGTCCCGCGCCGCCGGCTGATGCCTGA
IDG015-2D	anther specific	stamen-specific	1.00**	1.00**	uncharacterized protein	ATGGCCGCCGCCGGGAACCCCATCGGTGGCGTCCTTCTGCTTCTGCTGCTCGTAGCCGCCTTCATGTCCACCGCCGAAGGCAGAATCAAGGGGGTCGTCCGAGCGCCCTTGGCGTCTGTCGCACCAGGCGCCGGCGAGCGTGACATGGGAGGCGAGCGCGTGCCCACGCACTCCGTCGTCGACTGTTTCATGGGCTGCGTCAGCATGGCGGATGATTGTGGGAGCTTTTGCATGGACAAGCCGCTCGACGAAGCGAACGACTGCATGACGGAATGCCTCACCGCTGACCTCTCCTGCCTCACCGGCTGCGGCCCGGCACTCGGTCCCGCGCCGCCGGCTGATGCCTGA
IDG016-2A	anther specific	stamen-specific	0.96*	1.00**	uncharacterized protein	ATGGCGGTGGCCAGGATCGCCGCCGTCTTGACCGTGGCGGCGCTCTTCGCCGCGGCGGGGGCAGCGGATCCCCAACCCGCAAAGGGAGCACATTGCTGGCGGTACTACTCTTCCTGCATGCACAAGTGCGACGGCTACCGTGATGCCGCCGCCCGCTCCGTCAATCGTACTCAGCCCGCCGTCCACACAACCGTCGACGATGGTGCAGCAGCCGCCTCCATCCCCGTCAACTCTATCGATGGCACTGCAGCAATCACACACTCCACCGATGGCACTCTAGCCGCTGTCGACAAAACCGATGGTGCAGTCGCCCATATCGCCGACGGCTACGACGACAGGGACGACGATGACAAGGGCGACAAAAAGGATGACGATGACTACGGTGATAAGAATGACAAG…
IDG016-2B	anther specific	stamen-specific	0.94**	1.00**	uncharacterized protein	ATGGCGGCGGCCAGGATCGCCGTCCTCCTGGCCGTGGCGGCGCTCTTCACCGCGGCGGGGGCAGCGGATCCCCAACCCGCAAAGGGAGCACATTGCTGGCGGTGCTACTCTTCCTGCATGCACAAGTGCGACGGCCACCATGATGCCGCCGCCCGCTCTGCCAGCCGTACTCAGCCCGCAGTCCACACAACCGTCGATGATGGTGCAGCAGCCGCCTCCATCCCCGTCAACTCCACCAATGGCACTGCAGCAGTCGTACGCTCCACCGATGGCACTCCAGCCACCGATCATGCAGTCGGCCACATCGGTGATGCCAACGACGACGATAACAAGGACTACGACAAAGATGACGACAAGGACGACGGCGATGATAAGGACGACAAGGACGACGACGATAAG…
IDG016-2D	anther specific	stamen-specific	0.97**	1.00**	uncharacterized protein	ATGGCGGCGGCCAGGATCGCCGTCCTCCTGGCCGTGGCAGCGCTCTTCACCGCGGCGGGGGCAGCGGATCCCCAACGCGCAAAGGGAGCACATTGCTGGCGGTGCTACTCTTCCTGCATGCACAAGTGCGACGGCCACCGTGATGCCGCCGCCCGCTCTGCCAGCCGTACTCAGCCCGCAGTCCACACAACCGTCGATGATGGTGCAGCAGCCTCCTCCATCCCCGTCAACTCTACCAATGGCACTGCAGCAGTCGTACACTCCACCGATGGCACTCTAGCCACTGTTGACAAAACCGATCCAGCAGTCGGCCACATCGGTGATGCCAACGACGACGATAACAAGGACTACGACAAAGATGACGACAAGGACGACGGCGATGATAAGGACGACAATAAG…
IDG017-2A	anther predominant	stamen-specific	1	1.00**	cytochrome P450 86B1-like	ATGTCAATTATGTTCTCGCAAGAGCTTCCCATCTACACAGCACTCCTGCTACTTGTTCTTCCCCTGTACTACTTGTACTCCAAGGCTAGTTGTAAATCAAAGAACCCAGCGGTGCTCCCCACAAACTGGCCAATACTGCGCATGTTCCCTTCCTTCGTGGCCAACTTCCACAAGATGAATGACTATTTCACCCTGGTCCTCGCCAGATCAGGCCACAACTTCAGGGTGCACGGCCCACCCGGGACCGGGATGCGGTTTTTCGTCACATGCGATCCTGCCAACATCCGGCACATCTTCACAACGAACTACACCAACTTTCCCAAGGGTGCGGAGTTTGCCGCAATCTTTGACATCATGAGCGGCGGCATCTTCACCATCGACGGTGAGCCAGCTTGTCGA…
IDG017-2B	anther predominant	stamen-specific	1.00**	1.00**	cytochrome P450 86B1-like	ATGTCAGTTATGTTCTCGCAAGAGCTTCCCATCTACACCGCACTCGTGCTACTTGTTCTTCCCCTGTACTACTTGTACTCCAAGGCTAGTTGTAGATCAAAGAACCCAGCAGTGCTCCCCACAAACTGGCCAATACTGCACATGTTCCCTTCCTTCCTGGCCAACCTCCACAAGATGAATGACTATTTCACCCTGGTCCTCGCCGGATCAGGCCACAACTTCAGGGCGCACGGCCCACCCGGGACCGGGATGCGGTTGTTCGTCACATGCGATCCCGCCAACATCCGGCACATCTTCACGACGAACTACACCAACTTCCCCAAGGGTGCGGAGTTTGCCGCAATCTTCGACATCATGAGCGGCGGCATCTTCACCATCGACGGTGAGCCAGCTCGTCGG…
IDG018-2B	anther specific	stamen-specific	1.00**	1.00**	putative RAFTIN1/BURP domain-containing protein	ATGCGGATGTTCCTAGCTCTCTGCGCCCTTGGGTTCGTCGCAGGAGTAGTAGAAGATGGATCGTCGTTTGACGTCAGCGCTTACCCGGTCAAGTGGGACGAGGACCCATCTGTGGGATCAGGTGACGTGGCCGCTCCACCGTCTCCCGGTACTGAGGCGCCGGCACCGCCTCCGAAGCATCACATGATGGTGAAGAAGGGCATGCTGTTTCTGGAGCGCGACCTCTTTGCCGGGGCGCTCCTGCCGGCAAACACCCGGCTGGGCTACGTCAGACGCACGAGTTCACCAGGCCCAGTCATTTCAAGTACTACAAGCCCAGTACCACCCTTCAGGTACAGCAGTTTCGAGAAAATCTTGAAGTTTTACAATGTAACCCACGGCTCCAAGCAAGCAGGGAGG…
IDG018-2D	anther specific	stamen-specific	1.00**	1.00**	putative RAFTIN1/BURP domain-containing protein	ATGCGGATGTTCCTAGCTCTCTGCGCCCTTGGGTTCGTCGCAGGAGTAGTAGAAGATGGATCGTCGTTTGACGTCAGCGCTTACCCGGTCAAGTGGGATGAGGACCCATCTGTGGGATCAGGGGACGTGGCCGCTCCACCGTCTCCCGGTACTGAGGCGCCGGCGCCGCCTCCGAAGCATCACATGATGGTGAAGAAGGGCATGCTGTTTCTGGAGCGCGACCTCTTTGCCGGGGCGCTCCTGCCGGCAAACACCCGGCTGGGCTACGTCAGACGCACGAGTTCACCAGGCCCAGTCATTTCAAGTACTACAAGCCCAGTACCACCCTTCAGGTACAGCAGTTTCGAGAAAATCTTGAAGTTTTACAATGTAACGCACGGCTCCAAGCAAGCAGGGAGG…
IDG019-3A	anther predominant	stamen-predominant	0.7749	able	cytochrome P450 94A1-like	ATGGAGCTCTCATTCACCTCGGCCCATCCCATGCTCCTCTTCCTGCTCCTACCTCTACTCTATGTCCTCCGCCTACGTCGGAACACCAGAAAGCAACCTCACGCCGACGGCCTCAAGGCCTACCCCATCATCGGCACGCTCCCGCACTTCGTCAAGAACCAGGACTGCCTCGTCGAGTGGTCGGCCGGCGTCGTCGCTCGTTGCCCCACGCACACCATGGTCTTCGACTTCAAGGGTCTCGGCCTCATGGCCGGTGCCATCACCGCGAATCCGGCCAATGTGGAATACATCGTGAAGACCAACTTCCAGAACTACCCCAAGGGTGAGTTCGTGGTGTCTGCCATGGCGGACTTCCTTGGCCATGGCATCTTCAACTCCGACGGCGACCAGTGGCTCTCG…
IDG019-3B	anther predominant	stamen-predominant	-0.573062	0.88**	cytochrome P450 94A1-like	ATGGCCATGGAGCTTTCGTTGACCTCGGCCCAACCCATGCTCCTGCTCCTGCTCCTACCTCTACTATATGTCCTCTGCCTACGTCGGAACACCAGGAAGCAACCTCACGCCGACGGCCTCAAGGCCTACCCCATCATCGGCACGCTCCCACACTTCGTCAAGAACCAGGACTGCCTCGTCGAGTGGTCGGCTGGCGTCATCGCTCGTTGCCCCACGCACACCATGGTCTTCGACTTCAAGAGCCTCGGCCTCATGGCCGGTGCCATCACAGCAAACCCGGCCAATGTGGAATACATCGTGAAGACCAACTTCCAGAACTACCCCAAGGGCGAGTTCGTGGTGTCCGCCATGGCGGATTTCCTCGGCCACGGCATCTTCAACTCCGACGGCGACCAGTGG…
IDG019-3D	anther predominant	stamen-predominant	0.716816	0.98**	cytochrome P450 94A1-like	ATGCTTCAGAATCCCCTTTTCTGTGTCAACCTCCAAGCACCCCCACTCACTCCTACAGTTTTATTTAGACTAGGCAAGCCAGAGATCTCGATCGCCATGGAGCTTTGGTTGACCTCGGCCCATCCCATGCTCCTCTTCCTGCTCCTACCTCTACTCTATGTCCTCCGCCTACGTCGGAACACCAGAAAGCAACCTCACGCCGACGGCCTCAAGGCCTACCCCATCATCGGCACCCTCCCACACTTCGTGAAGAACCAAGACTGCCTCGTCGAGTGGTCGGCCGGCGTCGTCGCTCGTTGCCCCACGCACACCATGGCCTTCGACTTCAAGGGCCTTGGCCTCATGGCCGGTGCCATCACCGCGAACCCGGCCAATGTGGAATACATCGTGAAGACCAAC…
IDG020-3A	anther specific	stamen-specific	0.99**	1.00**	late cornified envelope-like proline-rich protein	ATGGTCTCCATGGCGGCGGCCAAGATCGCCGTCCTCCTGGCCGCGACGACGCTCTTCGCCGCGGCAGGGGCGGCGGACCCCCAACCTCCCCTACCCGGAAATGAAACCCAGTGCTGGCAGTGCTACTCCACCTGCATGCACAAGTGCGACAACAGCAGCTGCGGCGACGTCCAGAAGTACTTCCAGTGCAAGAAGTCATGCATCCTGGATTGCTACAAGGAACTGCCGCCGGTGTGCTTCAAGATGTGCATCTCCCAGACCTGCCTCACCCTGCCACCAGATAAACAGGTGGATTGCTACAAGGCATGTCGGACCAAATGTTTCCACAACCACCCGTACCCCGGGCCAAACCCAGGTCCAAAGCCACCAATGCCGCCCGGACCTCCGAAGCCGATGCCA…
IDG020-3B	anther specific	stamen-specific	0.99**	1.00**	late cornified envelope-like proline-rich protein	ATGGTCTCCATGGCGGCGGCCAAGATCGCCGTCCTCCTGGCCGCGACGGCGCTCTTCGCAGCAGCAGGAGCGGCGGACCCCCAACCTCCCCCAGCCGGAAATGAAACCCAGTGCTGGCAGTGCTACTCCACCTGCATGCATAAGTGCGACAACAGCAGCAGCGGCGACGTCCAGAAGTACTTCCAGTGCAAGAAGTCGTGCATCCTGGACTGCTACAAGGAACTGCCGCCGGTGTGCTTCAAGATGTGCATCTCCCAGACCTGCCTCACCCTGCCACCAGATAAACAGGTGGATTGCTACAAGGCATGTGGGACCAAATGCTTCCACAACCAGCCGTACCCCGGGCCAAACCCGGGTCCAAAGCCGCCAACGCCGCCCGGACCGCCGAAGCCTATGCCA…
IDG020-3D	anther specific	stamen-specific	1.00**	1.00**	late cornified envelope-like proline-rich protein	ATGGTCTCCATGGCGGCGGCCAAGATCGCCGTCCTTCTGGCCGCGACGGCGCTCTTCGCCGCAGCAGGAGCAGCGGACCCCCAACCTCCCCCAACCGGAAATGAAACCCAGTGCTGGCAGTGCTACTCCACCTGCATGCACAAGTGCGACAACAGCAGCTGCGGCGACGTCCAGAAGTACTTCCAGTGCAAGAAGTCGTGCATCCTGGACTGCTACAAGGAACTGCCGCCGGTGTGCTTCAAGATGTGCATCTCCCAGACCTGCCTCACCCTGCCACCAGATAAACAGGTGGATTGCTACAAGGCATGTGGGACCAAATGCTTCCATAACCACCCGTACCCCGGGCCAAACCCGGGTCCAACGCCGCCCGGACCTCCGAAGCCGATGCCACCGCCAGGA…
IDG021-3A	spike predominant	stamen-predominant	0.95**	0.99**	PISTILLATA-like MADS-box transcription factor PI-2 , TaAGL26-like	ATGGGGCGCGGGAAGATCGAGATCAAGAGGATCGAGAACCAGAGCAACCGCCAGGTGACCTTCTCCAAGCGCAAGAACGGGATCCTCAAGAAGGCCAAGGAGATCAGCGTGCTCTGCGACGCCGAGGTCGGCGTCGTCGTCTTCTCCAGCGCCGGCAAGCTCTACGACTTCTGCTCCCCCAAGACCTCGCTATCAAGAATCTTGGAGAAGTACCAGACCAACTCCGGGAAGATACTGTGGGATGAGAAACACAAGAGCCTCAGTGCGGAGATTGATCGAATCAAGAAAGAGAATGATAACATGCAGATCGAGCTCAGACACTTGAAAGGCGAAGATCTGAACTCGCTGCAGCCCAAAGAGCTGATCATGATTGAGGAAGCACTTGATAATGGGCTGACA…
IDG021-3B	spike predominant	stamen-predominant	0.96**	0.99**	PISTILLATA-like MADS-box transcription factor PI-2 , TaAGL26-like	ATGGGGCGCGGGAAGATCGAGATCAAGAGGATCGAGAACCAGAGCAACCGCCAGGTGACCTTCTCCAAGCGCAAGAACGGGATCCTCAAGAAGGCCAAGGAGATCAGCGTGCTCTGCGACGCCGAGGTCGGCGTCGTCGTCTTCTCCAGCGCCGGCAAGCTCTACGACTTCTGCTCCCCCAAGACCTCGCTATCAAGAATCTTGGAGAAGTACCAGACCAACTCCGGGAAGATACTGTGGGATGAGAAACACAAGAGCCTCAGTGCGGAGATTGATCGAATCAAGAAAGAGAATGATAACATGCAGATCGAGCTCAGGCACTTGAAAGGCGAAGATCTGAACTCGCTGCAGCCCAAAGAGCTGATCATGATTGAGGAAGCACTTGATAATGGGCTGACA…
IDG021-3D	spike predominant	stamen-predominant	0.98**	1.00**	PISTILLATA-like MADS-box transcription factor PI-2 , TaAGL26-like	ATGGGGCGCGGGAAGATCGAGATCAAGAGGATCGAGAACCAGAGCAACCGCCAGGTGACCTTCTCCAAGCGCAAGAACGGGATCCTCAAGAAGGCCAAGGAGATCAGCGTGCTCTGCGACGCCGAGGTCGGCGTCGTCGTCTTCTCCAGCGCCGGCAAGCTCTACGACTTCTGCTCCCCCAGGACCTCGCTATCAAGAATCTTGGAGAAGTACCAGACCAACTCCGGGAAGATACTGTGGGATGAGAAACACAAGAGCCTCAGTGCGGAGATTGATCGAATCAAGAAAGAGAATGATAACATGCAGATCGAGCTCAGACACTTGAAAGGCGAAGATATGAACTCGCTGCAGCCCAAAGAGCTGATCATGATTGAGGAAGCACTTGATAATGGGCTGACA…
IDG022-3A	spike predominant	stamen-predominant	0.32	0.82**	glycerol-3-phosphate acyltransferase 6	ATGGCGTCTCCGAGATTCAAGCCCGTGGAGGAGTGCAGCTCCGAGGGGAGGTCGGGGCAGACGGTGGCCGCAGACTTCGACGGCACGCTGCTCCGCTCCTCCAACGCCTTCCCCTACTACCTCCTGGTGGCGCTGGAGGCCGGCAGCGTCCTCCGCGCCGTGGCGCTGCTCCTGTCGGTGCCCTTCGTGTACGTGACCTACATCTTCTTCTCCGAGTCGCTGGCCATCAGCACCCTGGTGTACATCTCCGTGGCCGGGCTCAAGGTGCGGAGCATCGAGATGGCGGCGCGGTCGGTGCTGCCCAAGTTCTACGCGCAGGACGTGCACCCAGAGAGCTGGCGGGTGTTCCGGTCCTTCGGCAAGCGGTACATCATCACGGCCAGCCCCAGGGTCATGGTG…
IDG022-3B	spike predominant	stamen-predominant	0.33	0.88**	glycerol-3-phosphate acyltransferase 6	ATGGCGTCTCCGAAATTCAAGCCCGTGGAGGAGTGCAGCTCCGAGGGGAGGTCGGCGCAGACGGTGGCCGCCGACTTCGACGGCACGCTGCTCCGGTCCTCCAATGCCTTCCCCTACTACCTCCTCGTGGCGCTGGAGGCTGGCAGCGTCCTCCGCGCCGTGGCGCTGCTCCTGTCGGTGCCGTTCGTGTACGTGACCTACATCTTCTTCTCCGAGTCGCTGGCCATCAGCACCTTGGTGTACATCTCCGTGGCCGGGCTCAAGGTGAGGAGCATCGAGATGGCGGCGCGGTCGGTGCTGCCCAAGTTCTACGCGCAGGACGTCCACCCGGAGAGCTGGAGGGTGTTCAGGTCCTTCGGCAAGCGGTACATCATCACGGCCAGCCCCAGGGTCATGGTG…
IDG022-3D	spike predominant	stamen-predominant	0.23	0.89**	glycerol-3-phosphate acyltransferase 6	ATGGCGTCTCCGAAATTCAAGCCCGTGGAGGAGTGCAGCTCCGAGGGGAGGTCGGGGCAGACGGTGGCCGCCGACTTCGACGGCACGCTGCTCCGCTCCTCCAACGCCTTCCCCTACTACCTCCTCGTGGCGCTGGAGGCTGGCAGCGTCCTCCGCGCCGTGGCGCTGCTCCTGTCGGTGCCCTTCGTGTACGTGACCTACATCTTCTTCTCCGAGTCGCTGGCCATCAGCACGCTCGTGTACATCTCCGTGGCCGGGCTCAAGGTGCGGAGCATCGAGATGGCGGCGCGGTCGGTGCTGCCCAAGTTTTACGCGCAGGACGTCCACCCGGAGAGCTGGCGGGTGTTCCGGTCCTTCGGCAAGCGGTACATCATCACGGCCAGCCCCAGGGTCATGGTG…
IDG023-3A	spike predominant	pistil-predominant	0.54**	0.59**	DUF642 and CBM_4_9 domain-containing protein	ATGGAGCGAGGGCTCGTCGCATTGCTGGGTCTGGGGCTGGCGCTTCTTCTGCTGGCGCCCTCCCGTCGTCTCGCCTCGGCCGCTCCGGTGGAGGACGGCCTCCTCATGAATGGTGATTTCGAGACAGCACCACCTGGCGGTTTCGTCAAATCTGCTTCAGTTTCCGAGGGCGCAGCGATCCCAAGCTGGATGATCAATGGAACAGTTGAGCTCATTTCCGCAGGCCAGCACCAGGGTGGCATGATCCTTATTGTTCCACAAGGCGATCATGCTGTGCGGCTAGGGAATGATGCAGGCATTGGGCAGGTGGTGGAGGTTGAGAAGGGCTCAGAGTACGCGATCACATTCAGCGCCGCCCGGACCTGCGCGCAGCTGGAGTCACTGAACATCTCCGCTGGG…
IDG023-3B	spike predominant	pistil-predominant	0.60**	0.62**	DUF642 and CBM_4_9 domain-containing protein	ATGGAGCGAGGGCTCGCATTGCTGGGTCTGGGGCTGGCGCTTCTTCTGCTGGCGCCCTCTCGTCGTCTCGCCTCGGCCGCTCCGGTGGAGGACGGCCTGCTCATGAATGGTGATTTCGAGACAGCACCACCTGGCGGTTTCGTCAAATCGGCTTCAGTTTCCGAGGGCGCGGCGATCCCAAGCTGGACGATCAATGGAACAGTTGAGCTCATTTCCGCAGGCCAGCACCAGGGTGGCATGATCCTTATTGTTCCACAAGGGGATCATGCTGTGCGGCTAGGGAATGATGCAGGCATTGGGCAGGTGGTGGAGGTTGAGAAGGGCTCAGAGTACGCGATCACATTCAGTGCCGCCCGGACCTGCGCGCAGCTGGAGTCACTGAACATCTCCGCCGGGAGC…
IDG023-3D	spike predominant	pistil-predominant	0.59**	0.65**	DUF642 and CBM_4_9 domain-containing protein	ATGGAGCGAGGGCTCGCATTGCTGGGTCTGGGGCTGGCGCTTCTCCTGCTGGCGCCCTCTCGTCGTCTCGCCTCGGCCGCTCCGGTGGAGGACGGCCTGCTCATCAATGGTGATTTCGAGACAGCGCCACCTGGCGGTTTCGTCAAATCTGCTTCAGTTTCCGAGGGCGCAGCGATCCCAAGCTGGACGATCAATGGAACAGTTGAGCTCATTTCCGCAGGCCAGCACCAGGGTGGCATGATCCTTATTGTTCCACAAGGGGATCATGCTGTGCGGCTAGGGAATGATGCAGGCATTGGGCAGGTGGTGCAGGTTGAGAAGGGCTCAGAGTACGCGATCACATTCAGTGCCGCCCGGACCTGCGCGCAGCTGGAGTCACTGAACATCTCCGCTGGGAGC…
IDG024-3A	anther predominant	stamen-specific	0.84**	1.00**	uncharacterized protein	ATGGCGGCCGGGCGAGCGTGTGCTCTTAGCGCGGTGCTGGTGGTGGTGGTGGCGCCGCTCCTCCTGGCCGGCGCGGCGGACGCCGACTGCTTCGATTACTGCTTCAAGGACTGCATCGCCAAGGACAAGAACATGATCGACTACTGCAACTACGCCTGCGACAAGACCTGCTACGCGGGCGCGCCCCAGCGGCCCTTGGCGGCGGCTGCCGCCTCCGGCGACATGGGATGCCAGCTCTCCTGCGCCAGGACTTCCTGCCACCGTCTGGATCCAGACCGCGAGGCCACTGGGGCCTGCTTCGGGCAGTGCTACGACGGCTGCAAGACCAAGACTCTGCCGAGGCCTCTCCGCGCCGGCGCCGGCATGCCCACCACGTCAGGCCCGGTGGTCGCCGACCTT…
IDG024-3B	anther predominant	stamen-specific	0.89**	1.00**	uncharacterized protein	ATGGCGGCCGGGCGAGCGTGTGCTCTTAGCGCGGTGCTTGTGGTGGTGGTGGCGCCGCTCCTCCTGGCCGGCGTGGCGGACGCCGACTGCTTCGACTACTGCTTCAAGGACTGCATCGCCAAGGACAAGAACATGATCGACTACTGCAACTACGCCTGCGACAAGACCTGCTACACGGGCGCGCCCCAGCGGCCCTTGGCGGCGGCTGCCGCCCCCGGCGACATGGGATGCCAGCTCTCCTGCGCCAGGACTTCCTGCCACCGTCTTGATCCAGACCGCGAGGCCGCTGAGGCCTGCTTCGGGCAGTGCTATGACGGCTGCAAGACCAAGACTCTGCCGAGGCCTCTCCGCGCCGGCGCCGGGATGCCCACCACGTTAGGCCCGGTGGTCGCCGACCTT…
IDG024-3D	anther predominant	stamen-specific	0.88**	1.00**	uncharacterized protein	ATGGCGGCTGGGCGAGCGTGTGCTCTTAGCGTGGTGCTGTTGGTGGTGGTGGCGGCGCCGCTCCTCCTGGCCGGCGTGGCGGACGCCGACTGCTTCGACTACTGCTTCAAGGACTGCATCGCCAAGGACAAGAACATGATCGACTACTGCAACTACGCCTGCGACAAGACCTGCTACGCGGGCGCGCCCCAGCGGCCCTTGGCGGCGGCTGCCGCCCCCGGCGACATGGGATGCCAGCTCTCCTGCGCCAGGACTTCCTGCCACCGTCTGGATCCAGACCGCGAGGCCGCTGAGGCCTGCTCCGGGCAGTGCTATGACGGCTGCAAGACCAAGACTCTGCCGAGGCCTCTCCGCGCCGGCGCCGGCATGCCCACCACGTTAGGCCCGGTGCTCGCCGAC…
IDG025-3A	anther specific	stamen-specific	1	1.00**	anther-specific protein RTS-like	ATGGCACGCACCGGCGCCACGACCACGACGGGAGCTGCCGCGGTGCTGCTCCTGCTGGCGCTGGTGGCCACGGGCGCCGCCGCGGTCGACGCGGCCGCTGGTGGCTACGAGATGACCGCGGCTGCTGCCGGCGGTCGCCGCGGCGGCCGGGCCCAGCCAGCGGGGCTGACGCAGTGCATGGGCGGGTGCGGGACGAAGGTCGCCTCGTGCCTCCTCGACTGCTACAACACGTCCACCGGAGGGACCGTGCCCATCTGCTACCTCGGATGCACCAACAACGCCGTCTTCTGCGCCACCGACTGCACCACCCAGGGGCTCTGA
IDG025-3B	anther specific	stamen-specific	1	1.00**	anther-specific protein RTS-like	ATGGCACGCACCGGCGCCACGACGACAGCTGCCGCGGCGCTGCTCCTGCTGGCGCTGGTGGCCACCAGCGCCGCCGCGGTCGACGCGGCCGCTGGTGGCTACGAGATGAATGCTGCTGCCGCTGCCGGCGGTCGCCGCAGCGTCCGGGCCCAGCCGGCGGGGCTGACGCAGTGCATGGGCGGGTGCGGGACGAAGGTCGCATCGTGCCTCCTCGACTGCTACAACACGTCCACCGGAGGGACCATGCCCATCTGCTACCTCGGATGCACCAACAACGCCGTCTTCTGCGCCACCGACTGCACCACCCAGGGGCTCTGA
IDG025-3D	anther specific	stamen-specific	1	1.00**	anther-specific protein RTS-like	ATGGCACGCACCGGCGCCACGACCACGACGGCAGCTGCTGCGGCGCTGCTCCTGCTGGCGCTGGTGGCCACCGGCGCCGCCGCGGTCGACGCGGCCGCTGGCGGCCATGAGATGACTGCTGCCGGCGGTCGCCGCGGCGTCCGGGCCCAGCCGGCGGGGCTGACGCAGTGCATGGGCGGGTGCGGGACGAAGGTCGCATCGTGCCTCCTTGACTGCTACAACACGGCCACCGGAGGGACCATGCCCATCTGCTACCTCGGATGCACCAACCACGCCGTCTTCTGCGCCACCGACTGCACCACCCAGGGGCTCTGA
IDG026-3A	spike predominant	inflorescence specific	1.00**	1.00**	uncharacterized protein	ATGGCGGGCGCAAGGAACAACGAGCTGCGCATGACCCTGCTCGGCCTGGCCCTGCTGGGGCTCCTGCTGCTGAGCCACACCGCGGCTCCGGTGGAAGCCGCCGCGGGCGTGCAGGAGAACAGCTTCTCCATGAACGGCGCCGGTGGCCGCAGTCTCAACAGCTTCAGCATGAACACCGCCGAGAGCGCTGAGGTCGCCAAGGGGGGGAAGGCCAAACCCGCCGCCGGCGACTTCTGA
IDG026-3B	spike predominant	inflorescence specific	1.00**	1.00**	uncharacterized protein	ATGGCGGGCGCAAGGAACAACGAGCTGCGCATGACCCTGCTCGGCCTGGCCCTGCTGGGGCTCCTGCTGGTGAGCCACACCGCGGCTCCGGTGGATGCTGCCGCGGGCGTGCAGGAGAACAGCTTCTCCATGAACGGCGCCGGCGGCCGCAGTCTCAACAGCTTCAGCATGAACACCGCCGAGGGCGAGGGCGCCAAGGGGGGGAAAGCCAAACCCGCCGCCGGCGACTTCTGA
IDG026-3D	spike predominant	inflorescence specific	1.00**	1.00**	uncharacterized protein	ATGGCGGGCACAAGGAACAACGAGCTGCGCATGACCCTGCTCGGCCTGGCCCTGCTGGGGCTCCTACTGCTGAGCCACACCGCGGCTCCGGTGGAAGCCGCCGCGGGCGTGCAGGAGAACAGCTTCTCCATGAACGGCGCCGGCGGCCGCAGTCTCAACAGCTTCAGCATGAATACCGCCGAGACCGGCGAGGGCGCCAAGGGGGGGAAACCCGCCGCCGGCGACTTCTGA
IDG027-3A	spike predominant	stamen-predominant	-0.93	0.87**	non-specific phospholipase C2	ATGGCGGTTCCCACGCCGCAGCGCCGTCTCCTGGCGGCCGCCATGGCCCTGCTCCTCGTGCTCGCCTCGTCCGGCGCGGTGGCGCGCGCGGGGATGAGCGGGCCGATCAAGACGGTGGTGGTGGTGGTGATGGAGAACCGGTCGTTCGACCACATGCTGGGGTGGATGAAGCGGCTGAACCCGGCGATCGACGGCGTGACGGGCGCCGAGTGGAACCCGGCCAACGCGTCGGACCCGTCGGCGGGGCCGCGGGTCTACTTCGGCGACGGCGCGCAGTTCGTGGACCCGGACCCGGGGCACTCGTACCAGGAGATCCGGCAGCAGATCTTCGGCTCCGACGACGCCACGGGACCGCCGCGGATGAACGGGTTCGTGCAGCAGGCGCGGTCCATCGGCGGG…
IDG027-3D	spike predominant	stamen-predominant	-1.15	0.69**	non-specific phospholipase C2	ATGGCGGTTCCCACGCCGCAGCGCCGTCTCCTGGCGGCCGCCATGGCCCTGCTCCTCGCCCTCGCCTCGTCCGGCGCCGGCGCCGTCGCCTTCGCGGGGCCGATCAAGACGGTGGTGGTGGTGGTGATGGAGAACCGGTCGTTCGACCACATGCTGGGGTGGATGAAGCGGCTGAACCCGGCCATCGACGGCGTGACGGGCGCCGAGTGGAACCCGGCCAACGCGTCGGACCCGGCGGCGGGGCCGCGCGTCTACTTCGGCGACGGCGCGCAGTTCGTGGACCCGGACCCGGGCCACTCGTACCAGGAGATCCGGCAGCAGATCTTCGGGTCCGACGACGCGTCCGGCCCGCCGCGGATGAACGGGTTCGTGCAGCAGGCGCGGTCCATCGGCGGCGGC…
IDG028-3A	spike predominant	pistil-predominant	0.59**	0.85**	Meiosis 5, protodermal factor 1-like	ATGGGGGCGCAGAGAGCTCTCCTCGCGAGCTTCCTGCTCGCCGCGTTGGCCACCCAGGCCTTCGTCGCCGTCTCGGCCAGGACCAGCCCGACGGACAAGGCAAGCCAAGATGACGTGAAGAAGCCGGACTGCGTGCCGTCGCTCGACCCGCACAACTTCCCCGGCCACGGGGGCACCACCGTGCCGCTTCCCTCGCACGGAGGCTCCTCCGGCACGCCGCCTTACCACGGAGGCTCCGGCACTACGCCGTCGCACGGCGGCTCCGGCTCGACTCCGTCGCACAGCGGCTCCGGGTCGACGGTGCCTGACCCGTCGCATGGCGGATACGGGACGCCGCCTTCGCACGGCGGCTCTGGTTCGCTGCCTGACCCGTCGCACAGCGGAGGAGGTTACGGATCC…
IDG028-3B	spike predominant	pistil-predominant	0.59**	0.84**	Meiosis 5, protodermal factor 1-like	ATGGGGGCGCAGAGAGCTCTCCTCGCGAGCTTCCTGCTCGCCGCGTTGGTCACCCAGGCCTTCGTCTCCGTCTCGGCCAGGACCGGCCCAACGGACAAGGCAAGCCAAGATGACGTGAAGAAGCCGGACTGCGTGCCGTCGCTCGACCCGCACAATTTCCCCGGCCACGGGGGCACCACGGTGCCGCTTCCCTCGCACGGGGGCTCCTCCGGCACGCCCCCCTACCACGGAGGCTCCGGCACGACGCCGTCGCACGGCGGCTCCGGCTCGACTCCGTCGCACAGCGGCTCTGGGTCGTTGCCTGACCCTTCGCACGGCGGGTACGGGACGCCGCCTTCGCACGGGGGCTCTGGATCGTTGCCTGACCCATCGCACAGCGGAGGAGGTTACGGGTCCACC…
IDG028-3D	spike predominant	pistil-predominant	0.55**	0.82**	Meiosis 5, protodermal factor 1-like	ATGGGGGCGCAGAGAGCTCTCCTCGCGAGCTTCCTGCTCGCCGCGTTGGCCACCCAGGCCTTCGTCTCCGTCTCGGCCAGGACCGGCCCGACGGACAAGGCAGGCCAAGATGACGTGAAGAAGCCGGACTGCGTGCCGTCGCTCGACCCGCACAATTTCCCCGGCCACGGGGGCACCACCGTGCCGCTTCCCTCGCACGGAGGCTCCTCCGGCACGCCCCCCTACCACGGAGGCTCCGGCACGACGCCGTCGCACGGCGGCTCCGGCTCGACTCCGTCGCACAGCGGCTCTGGTTCGTTGCCTGACCCGTCGCACGGCTGGTACGGGACGCCGCCTTCGCACGGGGGCTCTGGTTCGTTGCCTGACCCGTCGCACAGCGGAGGTTACGGGTCCACTCCG…
IDG029.1-3A	anther specific	stamen-specific	1.00*	1.00**	uncharacterized protein	ATGGCGATACCGAGGAAGAACTGGAGCTCCTTGAGCTTCGTCGTGGCCGCCCTCATGGTGATCATGGCTGCCACCCTTCTCCTCTCCACATGCGACGCCCGCAAAGTGAAGGATAAGCCCACCGCTTTCCCAGTGCCGGGGAAGTGCTACGCGAGGTTTTTCCCGAACTGCACCGAGCAGCGGTGCAAGATGTTCTGCGTCCAGCCGCTCCCCGGAGCCGTCTGCCTCGACAAAAAGACCTGTTGCTGCCCTGTTGCTTAA
IDG029.2-3A	anther specific	stamen-specific	1.00*	1.00**	uncharacterized protein	ATGGCGATAATGAAGAAGAACACGAGCTCCCTGAGCTTCGTCGTGGCCGCCCTCATCGTGGTCATGGCTGCCACCCTTCTCCTCTCCTCGTGCGACGCCCGCAAAGAGAAGGATAAGCCCACCGCTTCCCCCGTGTCGGGGAAGTGCTTCTCGAGGTTTTTCCCAAACTGCACCGAGCAGCGATGCAAGAAGTTCTGCGTCCAGCCACTCCCCGGAGCCGTCTGCATCGACAAAACCCACTGTTGCTGCCCTATTGCTTAG
IDG029.1-3B	anther specific	stamen-specific	1.00*	1.00**	uncharacterized protein	ATGGCGATGCTGAAGAAGAACACGGGCTCCCTCAGCTTCGTCGTGGCCGCCCTCATGGTGGTCATGGCTGCCACCCTTCTCCTCTCCTCGTGCGACGCCCGCAACACGAAGGATAAGCCCACCGCTTTCCCGGTGCCGGCGAAGTGCTACGCGAGGTCTTTCCCGAACTGCACCGAGGAGCGGTGCAAGATGTTCTGCATCCAGCCGCTCCCCGGAGCCGTCTGCCTCGACAAAAAGACCTGCTGCTGCCCTGTTGCTTAA
IDG029.2-3B	anther specific	stamen-specific	1.00**	1.00**	uncharacterized protein	ATGGCGCTGCTGAAGAAGAACACGAGCTCCCTGAGCTTCGTCGTGGCCACCCTCATGGTGGTCATGGCTGCCACCCTTCTCCTCTCCTCGTGCGACGCCCGCAAAGTGAAGGATAAGCCCACCGCTTTCCTCGTGGCGGGGAAGTGCTTCTCGAGGTTTTTCCCGAACTGCACCGAGCAGCGGTGCAAGAAGTTCTGCGTCCAGCCACTTCCCGGAGCCGTCTGCATCGACAAAACCCACTGTTGCTGCCCTATTGCTTAA
IDG029.1-3D	anther specific	stamen-specific	1.00*	1.00**	uncharacterized protein	ATGGCGGTCCTGAAGAAGAACACGAGCTCCCTGAGCTTCGTCGTGGCCGCCCTCATGGTGGTCATGGCTGCCACCCTTCTCCTCTCCTCGTGCGACGCCCGCAAAGTGAAGGATAAGCCCATCGCTTTCCCCGTGCCGGGGAAGTGCTACGCGAGGTTTTTCCCGAACTGCACCGAGCCGCGGTGCAAAAAGTTCTGCGTCCAGCCGCTCCCCGGAGCAGTCTGCCTCGACAAAAAACCTGCTGCTGCCCTGTTGCTTAACTATAAGTGCCGCTGA
IDG029.2-3D	anther specific	stamen-specific	1.00*	1.00**	uncharacterized protein	ATGGCGATGCTGAAGAAGAACACGAGCTCCCTGAGCTTCGTCATGGTCGCCCTCATGGTGGTCATGGCTGCCACCCTTCTCTACTCATGCGACGCCCGCAAAGTGAAGGATAAGCCCACCGCTTTCCCCGTGGCGGGGAAGTGCTTCTCGAGGTTTTTCGCGAACTGCACCGAGCCGCGGTGCAAGAAGTTCTGCGTCCAGCCACTCCCCGGAGCCGTCTGTATCGACAAAAACCATTGTTGCTGCCCTATTGCTTAG
IDG030-3A	spike specific	stamen-specific	0.99**	1.00**	cytochrome P450 86A2-like	ATGGTCTCCTTCTGGAGTTTCCTTCTGTCCTACCCTGAAGTTTTCCTAGCCATTGCTTGCTTCTTCTGCCTCTCCCTCTTCCGCCTTGTCCGACACTGCCACAAGAGTGACCTCCCGGTGAACTGGCCTGTTATTGGGATGCTTCCCTTCCTTGTGAGAAATCTGTACCAAATTCATGACAGTGTCACCGATATGCTCCGCGAGGCGGGATGCACCTTCAGGATCATTGGCCCGTGGTTCCTCAACATGAGCTTCCTGGCGACCTGCGACCCAGCCACTGTCAACCACTGCTTCAACACCAACTTCAACAACTACCCAAAAGGCAGTGAGTTCGCCGAGATGTTTGACATCCTAGGTGATGGGCTCCTTGTGGCGGACTCTGCGTCCTGGGAGTACCAG…
IDG030-3B	anther specific	low level of expression	1.00*	1.00**	cytochrome P450 86A2-like	ATGGCCTCCTTCTGGAGTTTCCTTCTGTCCTACCCTGAGGTTTTCCTAGCCATTGCTTGCTTCTTCTGCCTCTCCCTCTTCCACCTTGTCCGACACTGCCACAAGAGTGACCTCCCGGTGAACTGGCCTGTTCTTGGGATGCTTCCCTTCCTCGTGAAGAATCTGTACCACATTCATGACAGGGGCACCGATATGCTCCGAGAGGCGGGATGCACCTTCAGGATCATTGGCCCGTGGTTCCTCAACATGAGCTTCTTGGTGACCTGCGACCCAGCCACTGTCAACCACTGCTTCAACACCAACTTCAACAACTACCCAAAAGGCAGTGAGTTCGCCGAGATGTTTGACATCCTAGGTGATGGCCTCCTTGTGGCAGACTCTGAATCCTGGGAGTACCAG…
IDG030-3D	spike specific	stamen-specific	1.00**	1.00**	cytochrome P450 86A2-like	ATGGTCTCCTTCTGGAGTTTCCTTCTGTCCTACCCTGAAGTTTTCCTAGCCATTGCTTGCTTCTTCTGCCTCTCCCTCTTCCGCCTTGTCCGACACTGCCACAAGAGTGACCTCCCGGTGAACTGGCCTGTTATTGGGATGCTTCCCTTCCTCGTGAGAAATCTGTACCAAATTCATGACAGTGTCACCGATATGCTCCGCGAGGCGGGATGCACCTTCAGGATCATTGGCCCGTGGTTCCTCAACATGAGCTTCTTGGCGACCTGCGACCCAGCCACTGTCAACCACTGCTTCAATACCAACTTCAACAACTACCCAAAAGGCAGTGAGTTCGCCGAGATGTTCGACATCCTAGGTGATGGGCTCCTTGTGGCGGACTCTGAGTCCTGGGAGTACCAG…
IDG031-3D	spike specific	stamen-predominant	0.25	0.61**	glyoxysomal fatty acid beta-oxidation multifunctional protein MFP-a	ATGGCGGCGAAGGGGAGGACCGAGATGGAGGTGGGCGGCGACGGCGTCGCCGTCATCACCATCTGCAACCCGCCAGTCAACTCCCTCTCCATCGATGTACTCCTAAGCTTAAAGGAAAGCTATGAAGAAGCTCTTCAGAGGACGGATGTCAAAGCTATTGTTGTTACAGGGAAAGGAGGGAAATTTTCTGGAGGATTTGATATTAGTTCCTTTGGTGATCTTCACAGTGGAAAAATTGAGCAGCCAAAGGTTGGTTACATATCAATAGACATTCTCACTGAACTTCTGGAAGGAGCAACAAAGCCATCAGTGGCTGCAATTGATGGTCTTTGTCTTGGCGGAGGATTAGAAGTTTCCATGGCATGCCATGCACGTATTTCAACTCCCACTGCTCAATTA…
IDG032-4A	spike specific, anther predominant	stamen-specific	0.97	1.00**	acyl-[acyl-carrier-protein] desaturase	ATGGCATCCCTGCCTTCCCGCGGCGCCTCCCAAGCACCTTTGTGGTCTTCTTGCCCGAGGAGCAAAATCACGGTGATGGCCATGGCTTCCACGGCCAAGGATGGAGTTCCCGGAAAGGCCTTCAGTCCTCGCAAGGCGCCTCACAGAGACCGAGTCGCCCACTCATTGCCACCTGAAAAGAGAGAGATTTTTGATTCGCTTAACAGTTGGGCAGAGGACAACATTCTGGTGCTCTTGAAGCCGGTTGAAAGATCCTGGCAGCCACAGGACTACCTGCCAGACCCTTCCTCGGATAGATTTTATGATGAAGTCAAGGAGCTGAGGGAGCGAGCCGAGGAGATCCCCGATGAATACTTGGTATGTCTGGTTGGAGACATGGTCACTGAGGAAGCACTCCCT…
IDG032-5D	spike specific, anther predominant	stamen-specific	0.71	1.00**	acyl-[acyl-carrier-protein] desaturase	ATGGCATCCCTGCCTTCCCACGGCGCCTTCCATGCACCTCTTTGGTATTCTTGCTCGAGGAGCAAAACCATGGTGATGGCCACGGCTTCCAAGGCCAAGGATGGAGTTCCCGGAAAGGCCTTCAGTCCTCGCAAGGCGTCTCATAGAGACCGAGTAGCTCACTCATTGCCACCTGAAAAGAGAGAGATTTTTGATTCGCTTAACAGTTGGGCAGAGGACAACATTCTGGTCCTCTTGAAGCCGGTTGAAAGATCCTGGCAGCCACAGGACTACCTGCCAGACCCTTCCTTGGATAGATTTTATGACGAAGTCAAGGAGCTGAGGGAGCGAGCCGAGGAGATCCCCGACGACTACTTGGTATGTCTGGTTGGAGACATGGTCACTGAGGAAGCACTCCCT…
IDG033-4A	spike specific	stamen-predominant	0.98**	0.89*	fatty acyl-CoA reductase 2	ATGGGGAGCTCGTGCGTGAACCTCTCCCGCGCCGTCGCGGCCGCGAGGCGCCCGGGCTTCGCCACCGCCGGTGGCGCCGGCGGCCACGGGAGGAGCGTGGTTGCATTGTCGTCGTCGTCGTCGTCGAGGAGGCGCACCGCGGCTGACGGTGGCGTGTCGTGCGGCATCGCCAACGGGTACCTGGGCGGCTCCTCGGGCGGGTCGCGGCCGCCTTCCTTGCCGGTGCACGGCAAGAGCTCCGGGCCCGGTTCGGCGCGGGAGGCGGGTGGTGATCACGATCGCGCTGACGGGCTCGGGATCCAGGAGTTCCTTGGCGGCAAGAACTTCCTCATCACCGGCGGGACCGGCTTCCTAGCAAAAGTTCTGATCGAGAAAATCTTGAGGACGAACCCTGACGTG…
IDG033-4B	spike specific	stamen-predominant	1.00**	0.97*	fatty acyl-CoA reductase 2	ATGGGGAGCTCGTGCGTGAACCTCTCCCGCGCCGTCGCCGCCGCGAGGCGCCCGGGCTTCGCCGGCGGCGTCGGCGGCCACGGGAGGAGCGTGGTTGCATTGTCGTCGTCGTCGTCGTCGAGGAGGCGCACTGCCGCCGACGGCGGCTTGTCGTGCGGCATCGCCAACGGGTACCTGGGCGGCTCGTCGGGTGGGTCGCGGCCGCCTTCCTTGCCGGTGCACGGCAAGAGCTCCGGGCCCGGTTCGGCGCGGGAGGCGGGTGGTCACGATCACGCTGACGGGCTCGGGATCCAGGAGTTCCTTGGCGGCAAGAACTTCCTCATCACCGGCGGGACTGGCTTCCTAGCAAAAGTTCTGATCGAGAAAATCTTGAGGACGAACCCTGACGTGGGCAAGATA…
IDG033-4D	spike specific	inflorescence predominant	0.77**	-0.521182	fatty acyl-CoA reductase 2	ATGGGGAGCTCGTGCGTGAACCTCTCCCGCGCCGTCGCGGCTGCGAGGCGCCCGGGCTTCGCCGCCGGCGCCGGCGCCGGCTGCCACGGGAGGAGCGTGGTTGCATTGTCGTCGTCGTCGTCGTCGAGGCGGCGCACCGCCGCCGACGGTGGCGTGTCGTGCGGCATCGCCAACGGGTACCTGGGCGGGTCGCGGCCGCCTTCCTTGCCGGTGCACGGCAAGAGCTCCGGGCCCGGTTCGGCGCGGGAGGCGGGTGATCACGATCGCGCTGACGGGCTCGGGATCCAGGAGTTCCTTGGCGGCAAGAACTTCCTCATCACCGGCGGGACTGGCTTCCTAGCAAAAGTTCTGATCGAGAAAATCTTGAGGACGAACCCTGACGTGGGCAAGATATACGTG…
IDG034-4B	spike predominant	stamen-predominant	0.74**	0.93**	nucleoside diphosphate kinase	ATGGAGCAGACTTTCATCATGATCAAGCCCGACGGCGTCCAGAGAGGCCTGATTGGGGATATCATCAGCCGATTCGAGAAGAAAGGGTACTACTTGAAGGGGATGAAGTTTATGAACGTGGAGAAATCCTTCGCGCAGCAGCACTACGCCGATCTCTCTGCCCAGCCCTTCTTTGCCAAGTTGGTGGATTACATAATTTCCGGCCCTGTTGTGGCCATGGTGTGGGAGGGGAAGGATGTTGTCTTGACTGGCCGAAGGATCATCGGGGCCACCAGGCCCTGGGAGGCAGCTCCTGGCACCATCCGTGGTGACCATGCTGTGGAGGTTAGCAGGAATGTCATTCATGGAAGTGATTCTGTGGAGAACGGAAAGAAGGAGATCGCTCTGTGGTTCCCAGGA…
IDG034-4D	spike predominant	stamen-predominant	0.53**	0.81**	nucleoside diphosphate kinase	ATGGAGCAGACTTTCATCATGATCAAGCCCGACGGCGTCCAGAGAGGCCTGATTGGGGATATCATCAGCCGATTTGAGAAGAAAGGGTACTACTTGAAGGCGATGAAGTTTATGAATGTGGAGAAATCCTTCGCGCAGCAGCACTATGCCGATCTCTCTGCCCAGCCCTTCTTTGCCAAGTTGGTGGATTACATCATTTCCGGCCCTGTTGTGGCCATGGTGTGGGAGGGGAAGGATGTTGTCTTGACTGGCCGAAGGATCATCGGGGCCACCAGGCCCTGGGAGGCAGCTCCTGGCACCATCCGTGGTGACCATGCTGTGGAGGTTAGCAGGAATGTAATTCATGGAAGTGATTCTGTGGAGAACGGAAAGAAGGAGATCGCTCTGTGGTTCCCAGGA…
IDG035-4B	spike specific	inflorescence specific (spike_Z65)	1.00**	0.99**	group 3 grass pollen allergen	ATGGCCTCCGCCTCCAGGATGCTCACGGTGGCGGTGCTGGCGGCGCTGTTCGCCGGCGCGATGGCCGTGAAAGTGAAGTTGACGGTGCAGAAGGGGTCGGACAAAAAGAAGCTGGCGCTGAAGATCGACTACACAAGGCCAAACGACAGCCTGTCAGAGGTGGAGCTCCGGCAGCACGGCTCAGAGGAGTGGCAGCCCTTGACCAAGAAGGGCGACGTGTGGGAGGTCTCGTGCTCCAAGCCGCTGGTTGGCCCCTTCAACTTCCGCTTCTTGTCCAAGAATGGCATGAAGAACGTCTTCGACGAGGTCTTCTCCACCGATTTCAAGATCGGCAAAACCTACGAACCGGAATATTGA
IDG035.1-4D	spike specific	/	/	/	group 3 grass pollen allergen	ATGGCCTCCTCCTCGAGGATGCTCACGGTGGTGGTGCTGGCGGCGCTGTTCGCCGGCGCGATGGCCGTGAAAGTGAAGTTGACGGTGCAGAAGGGGTCCGACAAAAAGAAGTTGGCGCTGAAGATCGACTACACAAGGCCAAACGACAGCCTGTCAGAGGTGGAGCTCCGGCAGCACGGCTCAGAGGAGTGGCAGCCCTTGACCAAGAAGGGCGACGTGTGGGAGGTCTCGTGCTCCAAGCCGCTGGTTGGCCCCTTCAACTTCCGCTTCTTGTCCAAGAATGGCATGAAGAACGTCTTCGACGAGGTCTTCTCCACCGATTTCAAGATCGGCAAAACCTACCAACCGGAATATTGA
IDG035.2-4D	spike specific	/	/	/	group 3 grass pollen allergen	ATGGCCTCCTCCTCGAGGATGCTCACGGTGGTGGTGCTGGCGGCGCTGTTCGCCGGCGCGATGGCCGTGAAAGTGAAGTTGACGGTGCAGAAGGGGTCCGACAAAAAGAAGCTGGCGCTGAAGATCGACTACACAAGGCCAAACGACAGCCTGTCAGAGGTGGAGCTCCGGCAGCACGGCTCAGAGGAGTGGCAGCCCTTGACCAAGAAGGGCGACGTGTGGGAGGTCTCGTGCTCCAAGCCGCTGGTTGGCCCCTTCAACTTCCGCTTCTTGTCCAAGAATGGCATGAAGAACGTCTTCGACGAGGTCTTCTCCACCGATTTCAAGATCGGCAAAACCTACCAACCGGAATATTGA
IDG035.1-5A	spike specific	inflorescence specific (spike_Z65)	1.00**	1	group 3 grass pollen allergen	ATGGCCTCCTCCTCCAGGATGCTCACGGTGGTGGTGCTGGCGGCGCTGGTCGCCGGTGCGATGTGCGCCGTGAGGGTGAAGTTGACGGTGGAGAAGGGGTCCGACAAAAAGAAGCTGGCGCTCAAGATCGACTACACAAGGCCAGGCGACAGCCTGTCAGAGGTGGAGCTCCGGCAGCACGGCTCAGAGGAGTGGCAGCCGTTGACCAAGAAGGGCGACGTGTGGGAGGTCTCGTGCTCCAAGCCACTGGTTGGCCCCTTCAACTTCCGCTTCTTGTCCAAGAATGGCATGAAGAACGTCTTCGACGAGGTCTTCTCCACCGATTTCAAGATCGGCAAAACCTACCAACCAGAATATTGA
IDG035.2-5A	spike specific	/	/	/	group 3 grass pollen allergen	ATGGCCTCCTCCTCCAGGATGCTCACGGTGGTGGTGCTGGCGGCGCTGGTCGCCGGTGCGATGTGCGCCGTGAGGGTGAAGTTGACGGTGGAGAAGGGGTCCGACAAAAAGAAGCTGGCGCTCAAGATCGACTACACAAGGCCAGGCGACAGCCTGTCAGAGGTGGAGCTCCGGCAGCACGGCTCAGAGGAGTGGCAGCCGTTGACCAAGAAGGGCGACGTGTGGGAGGTCTCGTGCTCCAAGCCACTGGTTGGCCCCTTCAACTTCCGCTTCTTGTCCAAGAATGGCATGAAGAACGTCTTCGACGAGGTCTTCTCCACCGATTTCAAGATCGGCAAAACCTACCAACCAGAATATTGA
IDG036-5A	anther predominant	stamen-specific	-0.175114	1.00**	cytochrome P450 86B1	ATGTCACTCATCTCCACAGCACTTGTGCTACTTGTTCCCCTAGGTCTTTACTTGTACATGTGGTCTAGTACTCGTAGTAGATCAAATGACCCAGCATCAGTGCTCCCCACAAAATGGCCAATAGTAGGCATGCTCCCTGGTCTCGTGGCCAACATCTACAACTTCCATGAGTACAGCTATGCGCTCCTCGCCGGATCAGGCCTCAACTTCAATGGGGACGGCCCGCCTGGGGCCGGGATGCGGTTCTTCATTACCTGCGACCCTGCCAACATCCAGCACATCTTCACAACCAACTACTCCAACTTCCCCAAGGGCGCCGAATTCGCCGCCATATTCGACATCATGGCTGGTGGCTTCTTCACCATCGATGGCGAGCTGTGGCGCTTGCGCCGCATGAAG…
IDG036-5B	anther predominant	stamen-specific	0.699716	1.00**	cytochrome P450 86B1	ATGTCACTCATCTCCACAGCACTTGTGCTACTTGTTCCCCTAGGTCTTTACTTGTACATGTGGTCTTGTACTCATAGTAGATCAAATGACCCAGCAGCAGCAGTGCCCCCCACAAAATGGCCAATACTAGGCATGCTCCCTGGTCTCGTGGCCAACATCTACAACTTCCATGAGTACAGCTATGCGCTCCTCGCCGGATCAGGCCTCAACTTCAATGGGGACGGCCCGCCTGGGGCCGGGATGCGGTTCTTCATCACCTGCGACCCTGCCAACATCCAGCACATCTTCACGACCAACTACTCCAACTTCCCCAAGGGCGCCGAATTCGCCGCCATATTCGACGTCATGGCTGGTGGCTTCTTCACCATCGATGGCGAGCTGTGGCGCTTGCGCCGCATG…
IDG036-5D	anther predominant	stamen-specific	1.00**	1.00**	cytochrome P450 86B1	ATGTCACTCATCTCCACAGCACTTGTGCTACTTGTTCCCCTAGGTCTTTACTTGTACATGTGGTCCAGTACTCGTAGTAGATCAAATGACCCAGCATCGGTGCTCCCCACAAAATGGCCGATACTAGGCATGCTCCCTGGTCTCGTGGCCAACATCTGCAACTTCCATGAGTACAGCTATGCGCTCCTCGCCGGATCAGGCCTCAACTTCAATGGGGACGGCCCGCCTGGGGCCGGGATGCGGTTCTTCATCACCTGCGACCCTGCCAACATCCAGCACATCTTCACGACCAACTACTCCAACTTCCCCAAGGGCGCCGAATTCGCCGCCATATTCGACATCATGGCTGGTGGCTTCTTCACCATCGATGGCGAGCTGTGGCGCTTGCGCCGCATGAAG…
IDG037-5A	spike specific, anther predominant	stamen-specific	-0.63	0.97**	acyl-[acyl-carrier-protein] desaturase	ATGGCATACATGCCTTCCTGCGGCACCTTCCATGCACCTTTAGTGTCTTCTTGCCTGAGGAGGAAATTCACAGTGGTGGCCACGGCTTCCAAGGCCAAGGTTGGAACTCCCAAAAAGGCCTCCACTCAAGTCCGATTCACGCAACCATTCCCACCTGAAAAGAAGGAAATTTTCGATTCATTGGAACGCTGGGCAGAGGAAAACATCCTGGTCCTGTTGAAGCCAGTAGAGAAATCATGGCAGCCGCAGGACTACCTACCAGACCCTTCCTCGGATGGATTCTATGATGAAGTCAAGGAGTTGAGGGAACGGGCCAAGGAGATCCCGGATGACTACTTGGTCTGTCTGGTTGGAGACATGGTCACTGAGGAAGCACTCCCTACTTACCAGACAATGCTC…
IDG037-5B	spike specific, anther predominant	stamen-specific	-0.86	0.96**	acyl-[acyl-carrier-protein] desaturase	ATGGCATACATGCCTTCCTGCGGCACCTTCCATGCACCTTTAGTGTCTTCTTGCCTGAGGAGGAAATTAACAGTGGTGGCCACGGCTTCCAAGGCCAAGGTTGGAACTCCCGAAAAGGCCTCCACTCAAGTCCGATTCGCGCAACCATTCCCACCTGAAAAGAAGGAAGTTTTCGATTCATTGGAGCGCTGGGCAGAGGACAACATCCTGGTCTTGTTGAAGCCAGTAGAGAAATCCTGGCAGCCGCAGGACTACCTGCCAGACCCTTCCTCGGATGGATTCCATGATGAAGTCAAGGAGTTGAGGGAACGGGCCAAGGAGATCCCGGATGACTACTTGGTCTGTCTGGTTGGAGACATGGTCACTGAGGAAGCACTCCCTACTTACCAGACAATGCTC…
IDG037-5D	spike specific, anther predominant	stamen-specific	-0.52	0.98**	acyl-[acyl-carrier-protein] desaturase	ATGGCATACATGCCTTCCTGCGGCACCTTCCATGCACCTTTAGTGTCTTCTTGCCTGAGGAGGAAATTCACAGTGGTGGCCACGGCTTCCAAGGCCAAGGTTGGAACTCCCGAAAAGGCCCCCACTCGAGTCCGATTCGCACAACCATTCCCACCTCAGAAGAAGGAAGTTTTCGATTCACTGGAGCGCTGGGCAGAGGACAACATCCTGGTCCTGTTGAAGCCAGTAGAGAAATCCTGGCAGCCGCAGGACTACCTGCCAGACCCTTCCTCGGATGGATTCTATGATGAAGTCAAGGAGTTGAGGGAACGGGCCAAGGAGATCCCGGATGACTACTTGGTCTGTCTGGTTGGAGACATGGTCACTGAGGAAGCACTCCCTACTTACCAGACAATGCTC…
IDG038-5A	spike specific, anther predominant	stamen specific	1.00*	1.00**	acidic peroxidase	ATGGAGCGCGCCACCATGGCCCTGGCCTTCCTGCTCGCTGCACTGGCCGCTTCCGCTGGGGCCAACCCGGTCAACAAGTCCTGCGTCACCGGCAGCGCCGGCGCCTCTGTGAGCATCGGGTATGGCGGAGCCGGCGCCAGTGCTGGCGCCGGCGTGTCCCTCGACGCCGACTGCCCCCGTGCGGAGGAGATCGTCCGCGCGGCCGTCGAGCAGGCCGTGGCCGCCGACCCCCGCATGGCCGCCTCCCTCCTCCGCCTCCACTTCCACGACTGCTTCGTCAATGGTTGCGACGGCTCTGTGCTCCTGGACGACAAGCCGTTCTTCGTCGGCGAGAAGACGGCGGGGCCGAACATCAACTCGCTGAGGGGGTTCGAGGTCATCGACGCCATCAAGGCCGAG…
IDG038-5B	spike specific, anther predominant	stamen specific	1.00**	1.00**	acidic peroxidase	ATGGAGCGCGCCATCATGGCCCTGGCCTTGCTGCTTGCGACACTGGCCGCCTCCGCTGTGGCCAGCCCCGTCAACAAGTCCTGCGTCACCGGCAGCGCCGGCGCCTCCGTGAGCATCGGATACGGTGGAGCCGGCGCCAGTGCCGGCGCCGGCGTGTCCCTCGGCGCCGACTGCCCCCGTGCGGAGGAGATCGTCCGCGCGGCCGTCGAGCAGGCCGTGGCCGCCGACCCCCGCATGGCCGCCTCCCTCCTCCGCCTCCACTTCCACGACTGCTTCGTCAATGGCTGCGACGGCTCCGTGCTCCTGGACGACAAGCCGTTCTTCGTCGGCGAGAAGACCGCGGGGCCGAACATCAACTCGCTCAGGGGTTTCGAGGTCATCGACGCCATCAAGGCCGAG…
IDG038-5D	spike specific, anther predominant	stamen specific	0.99**	1.00**	acidic peroxidase	ATGGAGCGCGCCATCATGGCCCTGGCCTTGCTGCTTGCGACACTGGCCGCCTCCGCTGTGGCCAGCCCCGTCAACAAGTCCTGCGTCACCGGCAGCGCCGGCGCCTCCGTGAGCATCGGATACGGTGGAGCCGGCGCCAGTGCCGGCGCCGGCGTGTCCCTCGGCGCCGACTGCCCCCGTGCGGAGGAGATCGTCCGCGCGGCCGTCGAGCAGGCCGTCGCCGCCGACCCCCGCATGGCCGCCTCCCTCCTCCGCCTCCACTTCCACGACTGCTTCGTCAATGGTTGCGACGGCTCCGTGCTCCTGGACGACAAGCCGTTCTTCGTCGGCGAGAAGACAGCGGGGCCGAACATCAACTCGCTCAGGGGTTTCGAGGTCATCGACGCCATCAAGGCCGAG…
IDG039-5A	spike specific, anther predominant	stamen-specific	-9.69	0.94**	peamaclein-like	ATGAAGAAGCTTCGCACCACCACCGCCACCACCACTCTCGCTCTCATTCTCCTCCTCGTCCTCATAGCAGCCACGTCCCTCCGTGTCGCCATGGCTGGATCAGCGTTCTGCGACAGCAAGTGCGGGGTGAGGTGCTCCAAGACGGGCCGGCACGACGACTGCCTCAAGTACTGCGGGATATGCTGCGCCGAGTGCAACTGCGTGCCGTCGGGGACAGCCGGCAACAAGGACGAGTGCCCCTGCTACCGCGACAAGACCACCGGCCACGGCGCGCGCACGAGGCCCAAGTGCCCATGA
IDG039-5B	spike specific, anther predominant	stamen-specific	-4.84	0.96**	peamaclein-like	ATGAAGAAGCTTCGCACCACCACCGCCACCACCACTCTGGCTCTCCTTCTCCTCCTCGTCCTCCTAGCAGCCACGTCCCTCCGTGTCGCCATGGCTGGGTCAGCGTTCTGCGACGGCAAGTGCGGGGTGAGGTGCTCCAAGGCGAGCCGGCACGACGACTGCCTCAAGTACTGCGGGATATGCTGCGCCGAGTGCAACTGCGTGCCGTCGGGGACCGCCGGCAACAAGGACGAGTGCCCTTGCTACCGCGACAAGACCACCGGACACGGCGCGCGCACGAGGCCCAAGTGCCCATGA
IDG039-5D	spike specific, anther predominant	stamen-specific	-3.81	0.96**	peamaclein-like	ATGAAGAAGCTTCACACCACCACCGCCACCACCACTCTGGCTCTCCTTCTCCTCCTCGTCCTCCTAGCAGCCACGTCCCTCCGTGTCGCCATGGCTGGATCAGCGTTTTGCGACAGCAAGTGCGGGGTGAGGTGCTCCAAGGCGAGCCGGCACGACGACTGCCTCAAGTACTGCGGGATATGCTGCGCCGAGTGCAACTGCGTGCCGTCGGGGACCGCCGGCAACAAGGACGAGTGCCCGTGCTACCGCGACAAGACCACCGGCCACGGCGCGCGCACGAGGCCCAAGTGCCCATGA
IDG040.1-5B	anther predominant	stamen-predominant	-8.02	0.92**	chemocyanin	ATGGCACCGCAGGGAAGAGGCAGTGCCAACGTGGCCCTGGTCCTAGGGGTGCTTCTTCTCTGCACGCTCGTGGCGGAGGCGGCGGTGTTCAACGTCGGCGACCGCGGCGGCTGGTCCTTCAACACCAACTCCTGGCCCACCGGCAAGCGCTTCAAGGCCGGCGACGTCCTAGTGTTCAAGTACGACGCGACGGCGCACGACGTGGTGGCGGTGAGCGCGGCGGGGTACAAGGCCTGCGCCAAGCCGGCCAAGGGCGCCAAGGTCTACAAGTCCGGCTCCGACCGCGTCACGCTCGCCCGCGGCACAAACTACTTCATCTGCAGCATTCCCGGACACTGCCAGTCCGGCATGAAGATCGCCGTCACCGCCGTCTAG
IDG040.2-5B	anther predominant	stamen-predominant	-3.27	0.86**	chemocyanin	ATGGCGGCCCAGGGAAGAGGCGGTGCGGCCGTGGTCGTGGGCGTGCTGCTCGTCTGCGTGCTCCTGAGCGCGGCGGCGGTGGTGGAGGCGGCGGTGTTCAACGTCGGCGACCGCGGCGGCTGGTCCTTCAACACCAACTCCTGGCCCACCGGCAAGCGCTTCAAGGCCGGCGATGTCCTAGTGTTCAAGTACGACGCGACGGCGCATGACGTGGTGGCGGTGAGCGCGGCGGGGTACAAGGCCTGCGCCAAGCCGGCCAAGGGCGCCAAGGTCTACAAGTCCGGCGCCGACCGCGTCACGCTCGCCCGCGGCACAAACTACTTCATCTGCAGCATCCCCGGCCACTGCCAGTCCGGCATGAAGATCGCCGTCACCGCCGCCTAG
IDG040-5D	anther predominant	stamen-predominant	0.12	0.85**	chemocyanin	ATGGCAGCGCAGGGAAGAGGCAGTGCCAACGTGGCCGTGGTCCTCGGGGTGCTTCTTCTCTGCACGCTCGTGGCGGAGGCGGCGGTGTTCAACGTGGGCGACCGCGGCGGCTGGTCCTTCAACACCAACTCCTGGCCCACCGGCAAGCGCTTCAAGGCCGGAGACGTCCTAGTGTTCAAGTACGACGCAACGGCGCACGACGTGGTGGCGGTGAGCGCGGCGGGGTACAAGGCCTGCGCCAAGCCGGCCAATGGCGCCAAGGTCTACAAGTCCGGCGCCGACCGCGTCACGCTCGCCCGCGGCACAAACTACTTCATCTGCAGCATCCCCGGACACTGCCAGTCCGGCATGAAGATCGCCGTCACGGCCGCCTAG
IDG041-5B	anther predominant	stamen-specific	0.0578271	0.99**	cytochrome P450 86A1-like	ATGTCACTCATCTCCACAGCACTTGTGCTACTTGTTCCCCTAGGCCTTTACTTGTACCTGCTGCGGTCTAGTCGTAGAAGATCAAATAACCCAGCAGAAGCAGTGCTCCCCACAAAATTGCCAATACTAGGCATGCTCCCTTCTCTCTTGGCCAACATGTACAACTTCCATGAGTACAGCTCTGTGGTCCTCGCTGGATCAGGCCTCAACTTCAATGGGGACGGCCCACCTGGAGCCGGGATGCGATTCTTCATCACCTGCGACCCTGCCAACATCCAGCACATCTTCACGACCAACTACCACAACTTCCCCAAGGGCGCGGAATTCGCCGCCATCTTCGACATCATGGCTGGTGGCCTCTTCACTATCGACGGCGAGCTGTGCCGTCGGCGGCGCGTG…
IDG041-5D	anther predominant	stamen-specific	/	1.00**	cytochrome P450 86A1-like	ATGTCACTCATCTCCACAGCACTTGTGCTACTTGTTCCCCTAGGCCTTTACTTGTACCTGCTGCAGTCTAGTCGTAGAAGATCAAATAACCCAGCAGCAGCAGTGTTCCCCACAAAATGGCCAATGCTAGGCATGCTCCCTTCTCTCTTGGCCAACATGTACAACTTCCATGAGTACAGTTATTTGGTCCTCGCTGGATCAGGCCTCAACTTCAATGGGGACGGCCCTCCTGGGGCCGGGATGCGGTTCTTCATCACCTGCGACCCTGCCAACATCCAGCACATCTTCACGACCAACTACCACAACTTCCCCAAGGGTGCGGAATTCGCTGCCATCTTTGACATCATGGCAGGTGGCCTCTTCACTATCGACGGCGAGCTGTGGCATCGGCGCCGCGTG…
IDG042.1-6A	pistil specific	/	/	/	uncharacterized protein	ATGGCGTCCAAGGCATTCCCTGCTCTGGTCCTTCTGGCGCTCGTCTGCGGCCAGCTTGTGGTCGACGGCCATGCCCAGCCCTACACCGGCGGCGGCCGCATCAGGGGAGGAGGATCTGCTCCCGGAATGCAGCCACCGACTTACCCCACTGCCCATGCCCACTCCTCCACCATTGGAGAATACGATGGAGCTGGAAGGCCTTCAGCCGTGGAAGAAGACAAGGCCTTCATGGTCAACAGCCTGCCGGCGCACGACCGCCCGCTGCCTGTCCCGCCTACCGGTCACTAG
IDG042.2-6A	pistil specific	inflorescence specific (spike_Z65)	0.99**	/	uncharacterized protein	ATGGCGTCCAAGGCATTCCCTGCTCTGGTCCTTCTGGCGCTCGTCTGCGGCCAGCTTGTGGTCGACGGCCATGCCCAGCCCTACACCGGCGGCGGCCGCATCAGGGGAGGAGGATCTGCTCCCGGAATGCAGCCACCGACTTACCCCACTGCCCATGCCCACTCCTCCACCATTGGAGAATACGATGGAGCTGGAAGGCCTTCAGCCGTGGAAGAAGACAAGGCCTTCATGGTCAACAGCCTGCCGGCGCACGACCGCCCGCTGCCTGTCCCGCCTTCCGCTCACTAG
IDG042.3-6A	pistil specific	/	/	/	uncharacterized protein	ATGGCGTCCAAGGCATTCCCTGCTCTGGTCCTTCTGGCGCTCGTCTGCGGCCAGCTTGTGGTCGACGGCCATGCCCAGCCCTACACCGGCGGCGGCCGCATCAGGGGAGGAGGATCTGCTCCCGGAATGCAGCCACCGACTTACCCCACTGCCCATGCCCACTCCTCCACCATTGGAGAATACGATGGAGCTGGAAGGCCTTCAGCCGTGGAAGAAGACAAGGCCTTCATGGTCAACAGCCTGCCGGCGCACGACCGCCCGCTGCCTGTCCCGCCTTCCGCTCACTAG
IDG042.4-6A	pistil specific	/	/	/	uncharacterized protein	ATGGCGTCCAAGGCATTCCCTGCTCTGGTCCTTCTGGCGCTCGTCTGCGGCCAGCTTGTGGTCGACGGCCATGCCCAGCCCTACACCGGCGGCGGCCGCATCAGGGGAGGAGGATCTGCTCCCGGAATGCAGCCACCGACTTACCCCACTGCCCATGCCCACTCCTCCACCATTGGAGAATACGATGGAGCTGGAAGGCCTTCAGCCGTGGAAGAAGACAAGGCCTTCATGGTCAACAGCCTGCCGGCGCACGACCGCCCGCTGCCTGTCCCGCCTTCCGCTCACTAG
IDG042.5-6A	pistil specific	inflorescence specific (spike_Z65)	1.00**	/	uncharacterized protein	ATGGCGTCCAAGGCATTCCCTGCTCTGGTCCTTCTGGCGCTCGTCTGCGGCCAGCTTGTGGTCGACGGCCATGCCCAGCCCTACACCGGCGGCGGCCGCATCAGGGGAGGAGGATCTGCTCCCGGAATGCAGCCACCGACTTACCCCACTGCCCATGCCCACTCCTCCACCATTGGAGAATACGATGGAGCTGGAAGGCCTTCAGCCGTGGAAGAAGACAAGGCCTTCATGGTCAACAGCCTGCTGCCTGTCCCGCCTTCCGCTCACTAG
IDG042.6-6A	pistil specific	inflorescence specific (spike_Z65)	1.00**	/	uncharacterized protein	ATGGCGTCCAAGGCATTCCCTGCTCTGGTCCTTCTGGCGCTCGTCTGCGGCCAGCTTGTGGTCGACGGCCATGCCCAGCCCTACACCGGCGGCGGCCGCATCAGGGGAGGAGGATCTGCTCCCGGAATGCAGCCACCGACTTACCCCACTGCACATGCCCACTCCTCCACCATTGGAGAAAACGATGGAGGTGGAAGGCCTTCAACCGTGGAAGAAGACAAGGCCTTCATGGTCAACAGCCTGCCGGCGCACGACCGCCCGCTGCCTGTCCCGCCTTCCGCTCACTAG
IDG042.7-6A	spike specific	inflorescence specific (spike_Z65)	1.00**	/	uncharacterized protein	ATGGCTACGTCCAAGGCATTCCCAGCTCTGGTCCTTCTGGCGCTCGTCTGCACCCAGCTCATGGTCGGCGGCCATGCCCAGGCGTACATCGGCGGCGGCAGCATTAGGGGAGGAGGATCTGCTGCCGGACTGCAGCCACCGACTTACGCCCCTCCCCATGGCCACTCCTCCACCATTGGAGGGCGTTCAGCCGTGGAAGAAGACAAGGCCTTCATGGTCAACAGCCTGCCGGCGCACAACAACCCGCTTCCTGTCCCGCCTTCCGGTCAGTAG
IDG042.8-6A	pistil specific	/	/	/	uncharacterized protein	ATGGCGTCCAAGGCATTCCCTGCTCTGGTCCTTCTGGCGCTCGTCTGCGGCCAGCTTGTGGTCGACGGCCATGCCCAGCCCTACACCGGCGGCGGCCGCATCAGGGGAGGAGGATCTGCTCCCGGAATGCAGCCACCGACTTACCCCACTGCCCATGCCCACTCCTCCACCATTGGAGAATACGATGGAGCTGGAAGGCCTTCAGCCGTGGAAGAAGACAAGGCCTTCATGGTCAACAGCCTGCCGGCGCACGACCGCCCGCTGCCTGTCCCGCCTACCGGTCACTAG
IDG042.1-6B	pistil specific	inflorescence specific (spike_Z65)	1.00**	/	uncharacterized protein	ATGGCGTCCAAGGCATTCCCAGCTCTGGTCCTTGTGGCGCTCGTCTGCGGCCAGCTTGTGGTCGACGGCCATGCCCAGCCCTACACCGGCGGCGGCCGCATCAGGGGAGGAGGATCTGCCGACGGAGTGCAGCCACCGACTTACACCACCACCCATGGCCACTCCTCCACCATCGGAGAATACAACGGTGCTGCAAGGCCTTCAGCCGTGGAAGAAGACAAGGCCTTCATGGTCAACAGCCTGCCGGCGCACGACCGCCCGCTTCCTGTCCCGCCTTCCGGCCACTAG
IDG042.2-6B	pistil specific	inflorescence specific (spike_Z65)	0.99**	/	uncharacterized protein	ATGGCGTCCAAGGCATTCCCAGCTCTGGTCCTTCTGGCGCTCGTCTGCAGCCAGCTCGTGGTCGGCGGCCATGCCCAGCCCTACATCGGCGGCACCAGGGGAGGAGGAGGATCTGCCGCCGGACTGCGGCCACCGACTTCCACCGCTACCCATGGCCACTCCTCCACCATTGGAGGATACGACGGGACTGGAAGGCCTTCAGCCGTGGAAGAAGACAAGGCCTTCATGATCAACAGCCTGCCGGCGCACGACCGCCCGCTTCCTGTCCCGCCTTCCGGTCACTAG
IDG042.3-6B	pistil specific	inflorescence specific (spike_Z65)	1.00**	/	uncharacterized protein	ATGGCCTCCAAGGCATTCCCAGCTCTGGTCCTTGTGGCGCTCGTCTGCGGCCAGCTTGTGGTCGACGGCCATGCCCAGCCCTACACCGGCGGCGGCCGCATCAGGGGAGGAGGAGGATCTGCTGCCGGAGTGCAGCCACCGACTTACCCCGCCACCCATGCCCACTCCTCCACCATTGGAGAATACAACGGAGCTGCAAGGCCTTCAGCCATGGAAGAAGACAAGGCCTTCATGGTCAACAGCCTGCCGGCACACGACCGTCCGCTACCTGTCCCGCCTACAGGTCACTAG
IDG042.1-6D	pistil specific	inflorescence specific (spike_Z65)	1.00**	/	uncharacterized protein	ATGGCGCCCAAGGCATTCCCCGCTCTGGTCCTTCTGGCGCTCGTCTGCGGCCAGCTTGTGGTCGACGGCCATGCCCAGCCCTACACCGGCGGCGGCCGCATCAGGGGAGGAGGAGGATCTGCTGCCGGACTACAGCCACCGACTTACCCTCCTGCCCATGCCCACTCCTCCACCATTGGAGAATACAACGGTGCTGCAAGGCCTTCAGCCGTGGAAGAAGACAAGTCCTTCATGGTCAACAGCCTGCCGGCGCACGACCGCCCGCTTCCTGTCCCGCCTTCCGGCCACTAG
IDG042.2-6D	pistil specific	inflorescence specific (spike_Z65)	1.00**	/	uncharacterized protein	ATGGCTACGTCCAAGGCATTCCCAGCTCTGGTCCTTCTGGCGCTGGTCTGCGGCCAGCTCGTGGTCGGCGGCCATGCCCAGGCGTACATCGGAGGGGGAGGATCTGCTGCCGGACTGCGGCCACCGACTTCCACCACTACCCATGGCCACTCCTCCACCATTGGAGGATACGACGGAGCTGCATGGCCTTCAGCCATGGAAGAAGACAAGGCCTTCATGGTCAACAGCCTGCCGGCGCACGACCGCCCAGTACCTGTCCTGTCTACCGGTCACTAG
IDG042.3-6D	pistil specific	inflorescence specific (spike_Z65)	1.00**	/	uncharacterized protein	ATGGCTACGTCCAAGGCATTCCCAGCTCTGGTCCTTCTGGCGCTCGTCTGCAGCCAGCTCATGGTCGGCGGCCATGCCCAGGCGTACATCGGCGGCACCAGGGGAGGAGGAGGATCTGCTGCCGGACTGCAGCCACCGACTTCCACCACTACCCATGGCCACTCCTCCACCATTGGAGGGCGTTCAGCCGTGGAAGAAGACAAGGCCTTCATGGTCAACAGCCTGACGGCGCACAACCACCCGCTTCCTGTCCCGCCTTCCGCTCAGTAG
IDG043-6B	pistil predominant	pistil predominant	0.99**	0.96**	uncharacterized protein	ATGGCGAGGTCTGGTGGCCGGTGGGTCGTTGCGGCGGCGATAGTGGTGCTGCTGCTGACCACGGTGTCATCAGCATCAGCAGCAGCAGGTGTCGATTCAGCAACGACGGCACCGGCCAAGGTGTGGCAGCTCCCTCCAAGGATCCCTACAGAGCCCTTCCCGGTGCCAAAGCCCCCTTCTTCGTCGTCGTGGAAGGCGGTGAAGTCGTCTCTTCCTCCTCGCCACCGCCTCCCTACGGAACCGCCGTCGGAAAAGCGTACGTAA
IDG043.1-6D	pistil predominant	pistil predominant	0.99**	0.97**	uncharacterized protein	ATGGCGAGGTCTGCTGGTCGGTGGGCCGTTGCGCCGGCGATAGTGCTGCTGCTGCTGACCACGGCGTCATCAGCATCGGCAGCAGCAGGTGTCGATTCAGCAACGACGGCACCGGCCAAGGTGTGGCAGCTCCCTCCAAGATTCCCTACAGAGCCCTTCCCGGTGCCAAAGCCCCCTTCTTCGTCGTCGTGGAAGGCGGTGAAATCGTCTCTTCCTCCTCGCCACCGCCTCCCCACGGAACCGCCGTCGGAAAAGCATACGTAA
IDG043.2-6D	pistil predominant	pistil predominant	0.99**	0.97**	uncharacterized protein	ATGGCGAGGTCTGCTGGTCGGTGGGCCGTTGCGGCGGCGATAGTGCTGCTGCTGCTGACCACGGCGTCATCAGCATCGGCAGCAGCAGGTGTCGATTCAGCAACGACGGCACCGGCCAAGGTGTGGCAGCTCCCTCCAAGATTCCCTACAGAGCCCTTCCCGGTGCCAAGGCCCCCTTCTTCGTCGTCGTGGAAGGCGGTGAAATCGTCTCTTCCTCCTCGCCACCGCCTCCCCACGGAGCCGCCGTCGGAAAAGCGTACGTAA
IDG044-6A	spike predominant	pistil-predominant	0.53**	0.81**	MADS-box transcription factor AGL6-like	ATGGGGAGGGGAAGGGTCGAGCTGAAGCGCATCGAGAACAAGATCAACCGGCAGGTCACCTTCTCCAAGCGCCGCAACGGCCTGCTCAAGAAGGCCTACGAGCTCTCCGTGCTCTGCGACGCCGAGGTGGCGCTTATCATCTTCTCCAGCCGCGGCAAGCTCTACGAGTTCGGCAGCGCCGGCACAACAAAAACATTGGAAAGATACCAACACTGCTGCTATAATGCTCAAGATTCCAATGGCGCACTATCTGAAACTCAGAGCTGGTACCAGGAAATGTCAAAGCTAAAGGCAAAATTCGAAGCTTTGCAGCGAACTCAGAGACACTTGCTTGGGGAGGACCTAGGACCGCTCAGCGTGAAAGAACTGCAGCAGCTGGAGAAACAGCTAGAATGTTCT…
IDG044-6B	spike specific	pistil predominant	0.49*	0.78**	MADS-box transcription factor AGL6-like	ATGGGGAGGGGAAGGGTTGAGCTGAAGCGTATCGAGAACAAGATCAACCGGCAGGTCACCTTCTCCAAGCGCCGCAACGGCCTGCTCAAGAAGGCCTACGAGCTCTCCGTGCTCTGCGACGCCGAGGTGGCGCTCATCATCTTCTCCAGCCGCGGCAAGCTCTACGAGTTCGGCAGCGCCGGCACAACAAAAACATTGGAAAGATACCAACACTGCTGCTATAATGCTCAAGATTCCAATGGGGCACTATCTGAAACTCAGAGCTGGTACCAGGAAATGTCAAAGCTAAAGGCAAAATTCGAAGCGTTGCAGCGAACTCAGAGACACTTGCTTGGGGAGGACCTTGGACCGCTCAGCGTGAAAGAACTGCAGCAGCTGGAGAAACAGCTAGAATGTTCT…
IDG044-6D	spike specific	pistil-predominant	0.3	0.75**	MADS-box transcription factor AGL6-like	ATGGGGAGGGGAAGGGTCGAGCTGAAGCGCATCGAGAACAAGATCAATCGGCAGGTCACCTTCTCCAAGCGCCGCAACGGCCTGCTCAAGAAGGCCTACGAGCTCTCCGTGCTCTGCGACGCCGAGGTGGCGCTCATCATCTTCTCCAGCCGCGGCAAGCTCTACGAGTTCGGCAGCGCCGGCACAACAAAAACATTGGAAAGATACCAACACTGCTGCTATAATGCTCAAGATTCCAATGGCGCACTATCTGAAACTCAGAGCTGGTACCAGGAAATGTCAAAGCTAAAGGCAAAATTCGAAGCTTTGCAGCGAACTCAGAGACACTTGCTTGGGGAGGACCTTGGACCGCTCAGCGTGAAAGAACTGCAGCAGCTGGAGAAACAGCTAGAATGTTCT…
IDG045-6A	anther predominant	stamen-predominant	0.47**	0.94**	TCER1, fatty aldehyde decarbonylase, similar to Arabidopsis epicuticular wax protein CER1	ATGGCGACCAGGCCGGGGCCTTTGACTGAATGGCCATGGCAGAGGACGGGCAACTTCAAGTACCTGGTGATGGCGCCGGTGGTCGTCCACGGCGCGTACCGGGTGATGACCAAGGGGTGGGGCGACATCGACCTGGCCTACTCGCTGATCCTGCCGTCGCTGGCGCTGCGGATGATCCACAACCAGATCTGGATCAGCCTGTCCCGCTACCAGACCGCGCGCAGCAAGCACCGCATCGTGGACCGCGGCATCGAGTTCGAGCAGGTGGACCGCGAGCGCGGGTGGGACGACCAGATCGTCTTCAACGGGCTGCTCTTCTACGCCGGGTACCTGGCGATGCCGAGCGTGCGGAGGTTCCCGCTGTGGCGGACGGACGGGGCGGTGGCGACGGCGCTGCTG…
IDG045-6B	anther predominant	stamen-predominant	0.64**	0.90**	TCER1, fatty aldehyde decarbonylase, similar to Arabidopsis epicuticular wax protein CER1	ATGGCGACCAGGCCGGGGCCTTTGACTGAATGGCCATGGCAGAGGATGGGCAACTTCAAGTACCTGGTGATGGCGCCGGTGGTCGTCCACGGCGCGTACCGGGTGATGAACAAGGGGTGGGGCGACATCGACCTGGCCTACTCGCTGATCCTGCCGTCCCTGGCGCTGCGGATGATCCACAACCAGATCTGGATCAGCCTGTCCCGCTACCAGACCGCGCGCAGCAAGCACCGCATCGTCGACCGCGGCATCGAGTTCGACCAGGTGGACCGCGAGCGCGGGTGGGACGACCAGATCGTCTTCAACGGGCTGCTCTTCTACGTGGGGTACCTGGCGATGCCGAGCGTGCGGAGGTTCCCGCTGTGGCGGACGGACGGGGCGGTGGCGACGGCGCTGCTG…
IDG045-6D	anther predominant	stamen-predominant	0.09	0.87**	TCER1, fatty aldehyde decarbonylase, similar to Arabidopsis epicuticular wax protein CER1	ATGGCGACCAGGCCGGGGCCTTTGACTGAATGGCCGTGGCAGAGGATGGGCAACTTCAAGTACCTGGTGATGGCGCCGGTGGTCGTCCACGGCGCGTACCGGGTGATGAACAAGGGGTGGGGCGACATCGACCTGGCCTACTCGCTGATCCTGCCGTCGCTGGCGCTGCGGATGATCCACAACCAGATCTGGATCAGCCTGTCCCGCTACCAGACCGCGCGCAGCAAGCACCGCATCGTGGACCGGGACATCGAGTTCGAGCAGGTGGACCGCGAGCGCGGATGGGACGACCAGATCGTCTTCAACGGGCTGCTCTTCTACGTGGGGTACCTGGCGATGCCGAGCGTGCGGAGGTTCCCGCTGTGGCGGACGGACGGGGCGGTGGCAACGGCGCTGCTG…
IDG046-6A	spike specific	inflorescence predominant (spike_Z65)	0.90**	0.83**	1-aminocyclopropane-1-carboxylate oxidase	ATGGCACTTCCTGCTAATGCCGCTGCCTCGTTGAGCTTCCCGGTGATCCACATGGAGAAGCTTGAGACCGGGGAAAGGGGCGCGACCATGGGGGTCATCCGCGATGCCTGCGAGAACTGGGGATTCTTCGAGCTGCTGAACCATGGCATCTCGGCCGAGCTGATGGACGAGGTGGAGCGGGTGAGCAAGGCGCACTACGCGGCTTGCCGGGAGGAGCAGTTCAAGGAGTTCGCGGCGAAGACGCTGGAGGCCGGCGAGAAGGGCGACGACGTGAAGGACGTAGACTGGGAGAGCACCTTCTTCGTCCGCCACCTTCCCGCCTCCAACCTCGCCGACCTGCCCGACCTCGACCACCACTACAGGCAAGTGATGAAGGAATTCGCGGCGGAGATCGAGAAG…
IDG047-6A	anther specific	stamen-specific	1	1.00**	uncharacterized protein	ATGGCGGCGGTCAAGATCGCCGTCCTCCTGGCCGTGACGACGCTCTTCGCCCCGGCAGGGGCGGCGGACCCCCAACCCGCGCAGGTCGCAACGGAAGCCCAGTGCTGGCCGTGCTACTCCTCCTGCATGCACACGTGCGACGACGGCCACGGTGTCACCCCCGCCCCCGATGTCAACCGTTCTCAGCCAGCCGCCCACCCAGCCGTCGACAATGGTGCAGCGGCCGCCTCCGTCCCTGTCAACTCTACTGACGGTACTGCAGTTGTTGTACACTCCACCGTCGGCACTCTAGCTGCCATCCACAAAACCGATGGTTCAGGCGCCCCCATTGCTGACGGCTATGACGATTACAAAGGTGGCAACAAAAGTGACGGCGAGGGTTACTACGAGAAATACTTC…
IDG047-6B	anther specific	stamen-specific	1.00**	1.00**	uncharacterized protein	ATGGCGGCGGTCAAGATCGCCGTCCTCCTGGCCGCGACGACGGCGCTCTTCGCCGCCGCGGCAGGGGCGGCGGACCCCCAGCCCCCGCAGCTCGCAACGGAAGCCCAGTGCTGGCCGTGCTACTCCTCCTGCATGCAGACGTGCGACGCCCACGGCGGCACCCCCGCCCCCGATGTCGTCAACTCTACCGACGGTAGTGCAGTTGTTGCACACTCCACCGTCGGCGCTCCAGCTGTCATCCACAAAACCGACGATGGTTCAGCCGCCCCCGTTGCTGACGGCTATGACGACAAAGGCGGCAACAAAGGTGGCGGCGGGGATGACTACGAGAAATACTTCGAGTGCAAGAAGAAGTGCATCGTCGGTTGCTACAAGGACCTGCCGCCGGTGTGCTACAAG…
IDG047-6D	anther specific	stamen-specific	1.00**	1.00**	uncharacterized protein	ATGGCGGCGGCCAAGATCGCCATCCTCCTGGTCGCGGCCGCGCTCTTGGCCGCGGCAGGGGCGGCGGACCCCCAACCCCCGCAGCTCTCAACGGAAGCCCAGTGCTGGCCGTGCTACTCCTCCTGCATGCACACGTGCGACGACGGCCACGGTGGCACCCCCGCCCCCGATGTCGTCAACTCTACCGATGGCAGTGCAGTTGGTGTACGCTCCGCCGTCGGCACTCTCGCTGCCATCCACAAAACCGAGGATGGTTCAGGCGCCCCCATTGCCGACGGCTACGACGAGAAAGGTGGCAACAAAGGTGACGGCGAGGAATACTTCGAGTGCAAGAAGAAGTGCATCGTCTGTTGCTACAAGGACCTGCCGCCGGTGTGCTACAAGATGTGCGTCTCCCAG…
IDG048-6A	spike predominant	stamen-predominant	0.48**	0.32**	histone H2B	ATGGCACCCAAGGCAGCGGAGAAGAAGCCGGTGGCCACGGCCGAGAAGACCACCGCGGGGAAGAAGCCCAAGGCGGAGAAGCGGGCGCCGGCGACCAAGGAGGCCGGCGGCGAGGGGAAGACGAGGGGCAGGAAGAAGGGCAGCAAGGCCAAGAAGGGCGTGGAGACGTACAAGATCTACATCTTCAAGGTGCTCAAACAGGTGCACCCGGACATCGGCATCTCCTCCAAGGCCATGTCCATCATGAACTCCTTCATCAACGACATCTTCGAGAAGCTCGCCGGCGAGTCCGCCAAGCTGGCCCGCTACAACAAGAAGCCCACCATCACGTCCCGGGAGATCCAGACCTCCGTCCGCCTCGTCCTCCCCGGCGAGCTCGCCAAGCACGCCGTCTCCGAG…
IDG048-6B	spike predominant	stamen-predominant	0.43**	0.39**	histone H2B	ATGGCACCCAAGGCGGCGGAGAAGAAGCCGGTGGTGGCCGCGGAGAAGACCCCGGCGGGGAAGAAGCCCAAGGCGGAGAAGCGGGCGCCGGCGTCCAAGGAGGCCGGCGGCGAGGGCAAGACGAGGGGCAGGAAGAAGGGCAGCAAGGCCAAGAAGGGCGTGGAGACGTACAAGATTTACATCTTCAAGGTGCTGAAGCAGGTGCACCCGGACGTAGGCATCTCCTCCAAGGCCATGTCCATCATGAACTCCTTCATCAACGACATCTTCGAGAAGCTCGCCGGGGAGTCGGCCAAGCTGGCGCGGTACAACAAGAAGCCCACCATCACGTCCCGGGAGATCCAGACCTCCGTCCGCCTCGTCCTCCCTGGGGAGCTCGCCAAGCACGCCGTCTCCGAG…
IDG048-6D	spike predominant	stamen-predominant	0.48**	0.38**	histone H2B	ATGGCACCCAAGGCGGCAGAGAAGAAGCTGGCGCCGGCCACGGCAGAGAAGACGACGGCGGGGAAGAAGCCCAAGGCGGAGAAGCGGGCGCCGGCGACCAAGGAGGCCGGCGGCGAGGGCAAGACGAGGGGCCGGAAGAAGGGCAGCAAGGCCAAGAAGGGCGTGGAGACGTACAAGATCTACATCTTCAAGGTGCTCAAGCAGGTGCACCCGGACGTCGGCATCTCCTCCAAGGCCATGTCCATCATGAACTCCTTCATCAACGACATCTTCGAGAAGCTCGCCGGGGAGTCCGCCAAGCTGGCGAGGTACAACAAGAAGCCCACCATCACGTCCCGGGAGATCCAGACCTCCGTCCGCCTCGTCCTCCCCGGGGAGCTCGCCAAGCACGCCGTCTCC…
IDG049.1-6A	spike specific	inflorescence specific (spike_Z65)	0.99**	/	uncharacterized protein	ATGGCGATGGTGTCCTCCAAGCCCCTGGCCCTGCTGCTGCTCGTGGCTCTGTCCGCGGCAACGCCCATGCCGGCCGTCGGCGAAGGCTCCTGCAACGGCCACAAGGTGACGGTGCAGAACCTGTGCGGCCACGACCTGACCCTGGGCATCGAGGCGCGCTCCAACAGCAAGGAGCTCTTCCCCAACGGCTGGCTGCTCCCCAGCGGGAAGCACGAGTCGTTCGACGTGTGCGCGTGGACGGGGAGCGTCTCGGCGCAGGGCGCCGCCGTGGCCAAGTTCCACATAGACCACGAGGGCGGGGCGTACTACGAGGTGAGCACCGACCAGGCGAGCATGTCTGTCCGCGTCTCCGTCACCCCGCACGGCAGCCCGCTGCAGGGCCACTGCCCCACCGCCGGG…
IDG049.2-6A	spike specific	inflorescence specific (spike_Z65)	1.00**	/	uncharacterized protein	ATGGCAATGGCGTCGACCGAGCCCCTGGCCCTCCTGCTGCTCGTGGCTCTGTCCACGACGATGGCCATGCCCGCCGCCGGAGAAGGCTCCTGCAACGGCCACAAGGTGACGGTGCAGAACCTGTGCGGCCACGACCTGACCCTGGGCATCGAGGCGCGCTCCAACAGCAAGCCGCTCTTCCCCAACGGGTATCTGCTCCCCAGCGGGAAGCACGAGTCGTTCGACGTCTGCGCGTGGATAGGGAGCGTGTCCGCGCAGGGCGCCGCCGTGGCCGAGTTCCACATGGACCATGAGGGCGGGGCGTACTACGAGGTGAGCACCAACCAGGCGAGCATGTCCGTCCGCGTTTCGGTCACCCCGCACGGCAGCCCGCTGCAGGGGCACTGCCCCACCGCTGGG…
IDG049-6B	pistil specific	inflorescence specific (spike_Z65)	1.00**	/	uncharacterized protein	ATGGCGATGGCGTCCACCGAGCCCCTGGCCCTCCTGCTGCTGGTGGCTCTGTCCGCGACGGCCATGACCGTCGCCGGACAAGGCTCCTGCAACGGCCACAAGGTGACGGTGCAGAACCTGTGCGGCCACGACCTGACCCTGGGCATCGAGGCGCGCTCCAACAGCAAGGCGCTCTTCCCCAACGGGTATCTGCTCCCCAGCGGGAAGCACGAGTCGTTCGACGTGTGCGCGTGGACGGGGAGCGTGTCGGCGCAGGGCGCCGCCGTAGCCGAGTTCCACATGGACCACGAGGGTGGGGCGTACTACGAGGTGAGCACCAACCAGGCGAGCATGGCGGTCCGTGTCTCCGTCACCCCGCACGGCAGCCCGCTGCAGGGCCACTGCCCCACCGCCGGGTGC…
IDG049-6D	spike specific	inflorescence specific (spike_Z65)	1.00**	/	uncharacterized protein	ATGGCGATGGCGTCCACCAAGCCCCTGGCCCTCCTGCTGCTCGTGTTCGTGGCTCTGTGCGCGACGGCCATGACCGCCGCCGGCCAAGGCTCCTGCAACGGCCACAAGGTGACGGTGCAGAACCTATGCGGCCACGACCTGAACCTGGGCATCGAGGCGCGCTCCAACAGCAAGGCGCTCTTCCCCAACGGGTATCTGCTCCCCAGCGGGAAGCACGAGTCGTTCGACGTGTGCGCGTGGACGGGGAGCGTGTCGGCGCAGGGCGCCGCCGTGGCCGAGTTCCACATGGACCACGAGGGCGGGGCGTACTACGAGGTGAGCACCAACCAGGCCAGCATGCCCGTCCGTGTCTCCGTCACCCCGCACGGCAGCCCGCTGCAGGGCCACTGCCCCACCGCT…
IDG050.1-6A	anther specific	stamen-specific	1.00**	1.00**	non-specific lipid-transfer protein C6-like	ATGGCGTCGTCTAGCAAGCCCTGCGCCGCCTCCGTCCTCCTCCTGCTGCTGGCCCTCGCCGTCGCCACGGCGGCCGATGCGGCGAAAAAGAGCATCGCGTCGGAGCCCAAGTCCATCTTCTCGAGGCCGTCGGGAGCCATCTTCCCGAGGCCGGCGGCGAAGCACATCATCGCGTCGGAGCCCACCATCCCGAGGCCGTCGGCGGTGGACGTGTCGGCGACGTGCATGGGGTCGCTGCTGGAGCTGAGCCCGTGCCTGGCCTTCTTCAGGGACGCGGGCACGTCCAAGGCGCCCGCGGGGTGCTGCAAGGGCCTGGGCACCATCGTCCGAGACCAGCCCGCGTGCCTGTGCCACATCTTCAACCGCACCCTAGAGCGGGCCATCGGCGTTGACATCCCC…
IDG050.2-6A	anther specific	stamen-specific	1.00**	1.00**	non-specific lipid-transfer protein C6-like	ATGGCGTCCTCCAGCAAGGCCTGCGCCGCCGCCCTCCTTCTGCTGCTGGCCCTCGCGGTGGCCACGGCGGCCGGCGCGTCGAAGCGGAGCATCGCGTCGGAGGCCAACCCGAGGCCGGTGGGGAAGGTCATCGTGACGGAGCCCCCGGTCCCGACGTCGGCGCCGGCCAGCGCCGCGAAGTGGAGCATCGCGTCGGAGGCCAACCCAAGGCCGGTGGGGAAGGTCATCGTGACGGAGCCCCCGGTCCCGACGTCAGCGCCGGCCAGCGCGGCGAAGCGGAGCATCGCGTCGGAGGCCAACCCGAGGCCGGTGGCGAAGGTCATCGTGACCGAGCCCCCCGTCCCGACGTCGGCGGTGGTGGACGTGTCGGCGACGTGCATGGGGTCGCTGCTGGAGCTG…
IDG050.1-6D	anther specific	stamen-specific	1.00**	1.00**	non-specific lipid-transfer protein C6-like	ATGGCGTCGTCCAGCAAGCCCTGCGCCGCCTCCGTCCTCCTCCTGCTGCTGGCCCTCGCCGTCGCCACGGCGGCCGACGTAGCGAAGAAGAGCGTCGCGTCGGAGCCCAAGTCCATCTTCTCGAGGCCGTCGGGAGCCATCTTCCCGAGGCCGGCGGCGAAGGACATCATCGCGTCGGAGCCCACCATCCCGAGGCCGGCGGCGGTGGACGTGTCGGCGACGTGCATGGGGTCGCTGCTGGAGCTGAGCCCGTGCCTGGCCTTCTTCAGGGACGCGGGCACGTCCAAGGCGCCGGCGGGGTGCTGCAAGGGCCTGGGCAGCATCGTCCGAGACCAGCCAGCGTGCCTGTGCCACATTTTCAACCACACCCTGGAGCGGGCCATCGGCGTCGGCATCCCC…
IDG050.2-6D	anther specific	stamen-specific	1.00**	1.00**	non-specific lipid-transfer protein C6-like	ATGGCGTCGTCCAGCAAGCCCTGCGCCGCCTCCGTCCTCCTCCTGCTGCTGGCCCTCGCCGTCGCCACGGCGGCCGACGCGGCGAAGAAGAGCATCGCGTCGGAGCCCAAGCACATCTTCTCGAGGCCGTCGGGACCCATCATCTCGAGGCCGGCGGCGAAGGACATCATCGCGTCGGAGCCCACCATCCCGAGGCCGGCGGCGGTGGACGTGTCGGCGACGTGCATGGGGTCGCTGCTGGAGCTGAGCCCGTGCCTGGCCTTCTTCAGGGACGCGGGCACGTCCAAGGCGCCGGCGGGGTGCTGCAAGGGCCTGGGCACCATCGTCCGAGACCAGCCGGCGTGCCTGTGCCACATCTTCAACCACACCCTGGAGCGGGCCATCGGCGTCGGCATCCCC…
IDG051-6B	anther specific	stamen-predominant	-0.8	0.82**	acyltransferase-like protein	ATGGCGACTCTTTCTCTCTCCCTGGCACACCCGCAGGTCCGCGCCCTCTGGCGACAAGCAGGGCGGCCGCAGCGGTCGCGTGGCTCGTCCAGCCGCCGGTTCAGGCACGCACACGCCGCCGGGAGGGTGCAGGCCAGCTACAGGGGTCTTGAGCCGCTGTACGATGATGGGTACGGGACGGTCAAGGACCTGGGCCACTACTATCGGGCGATCGGGGAGCTGGTGGAGCACGACGGCGGGCCGCCCCGCTGGCTTTGCCCCGTCGACGCCGGCGAACCGGCGGTCGAGGATGCCCCGGTCATGCTGTATTTGCCAGGGATAGATGGAATGGGGATGGGGCTCTGCATGCACCACAAGGCTCTTGGAACGATATTTGAACTTAGATGCATGCACATTCCT…
IDG051-6D	anther specific	stamen-predominant	-0.64	0.96**	acyltransferase-like protein	ATGGCGACTCTTTCTCTCTCCCTGGCACACCCGCAGGTCCGCGCCCTCTGGCGACAAGCAGGGCGGCCGCAGCGGTCGCGTGGCTCGTCCAGCCGCCGGTTCAGGCACGCACACGCCGCCGGGAGGGTGCAGGCCAGCTACAGGGGTCTTGAGCCGCTGTACGATGATGGGTACGGGACGGTCAAGGACCTGGGCCACTACTATCGGGCGATCGGGGAGCTGGTGGAGCACGACGGCGGGCCGCCCCGCTGGCTTTGCCCCGTCGACGCCGGCGAACCGGCGGTCGAGGATGCCCCGGTCATGCTGTATTTGCCAGGGATAGATGGAATGGGGATGGGGCTCTGCATGCACCACAAGGCTCTTGGAACGATATTTGAACTTAGATGCATGCACATTCCT…
IDG052.1-6B	spike specific	stamen-predominant	0.33	0.93**	1-aminocyclopropane-1-carboxylate oxidase	ATGGCAATTCCTGCTAATGCTGCTGTCTCGTTGAACTTCCCGGTGATCAACATGGAGAAGCTTGAGACCGGGGAGAGGGGCGCGGCCATGGAGGTCATCCACGACGCCTGCCAGAACTGGGGATTCTTCGAGCTGCTGAACCATGGCATCTCCGCCGAGCTGATGGACGAGGTGGAGCGGGTGAGCAAGGCCCACTACGCGGCGTGCCGGGAGGACAAGTTCAAGGAGTTCGCGGCGAAGACGCTGGAGGCCGGCGAGAAGGGCGCCGACGTGAAGGACGTGGACTGGGAGAGCACCTTCTTCGTCCGTCACCTCCCCGCCTCCAACCTCGCCGACCTGCCCGACCTCGACCACCACTACAGACAAGTGATGAAGGAATTCGCGTCCGAGATCGAGAAG…
IDG052.2-6B	anther predominant	low level of expression	0.46	0.92**	1-aminocyclopropane-1-carboxylate oxidase	ATGGCAATTCCTGCTAATGCTGCCGCCTCCTTGAGCTTCCCGGTGATCAACATGGAGAAGCTGGAGACCGAGGAGAGGGGCGCCGCCATGGGGGTCATCGGCGACGCCTGCGAGAACTGGGGCTTCTTCGAGCTGCTGAACCATGGCATCTCGCACGAGCTGATGGACGAGGTGGAGCGGGTGAGCAAGGCGCACTACGCGGCGTGCCGGGAGCAGCAGTTCAAGGAGTTCGCGGCGCGGACGATGGAGGCCGGCGAGAAGGGCGCCGACGTGAAGGGCGTGGACTGGGAGAGCACCATCTTCGTCCGCCACCTCCCCGCCTCTAACCTCGCCGACCTGCCCGACCTCGACCACCACTACAGGCAAGTGATGAAGGAATTCGCGGCGGAGATCGAGAAG…
IDG053-6B	anther specific	stamen-specific	0.82	1.00**	zinc transporter-like	ATGAAGTCCGCCATGGATCGTCCCTTGCTCCTCGCAGCCATAGTAGCGTTGATAATTATTGTTCCTGCAGCGCAAGCAGACGATGGTGGCTGCGGGTCCGGGAAGGCGGGTACCAACCACCGCAGTGCTAATTCGCTAAAGATTGCCGCTTTCTTCTCAATATTAATCTGCGGGGCGCTCGGGTGCGGCCTGCCTGTGATGGGACGGCGTGTGCCTTGGCTGAACGCTGATGCCGACGCCTTCTTTCTGATCAAGGCGTTGGCAGCAGGAGTTATTCTTTCCACGGGCTTCATCCATATTCTTCCAGATGCGTTTGAAGACCTTACATCAGATTGCCTACCAGTCAGCGGCCCCTGGAAAGAATTCCCCTTCGCTGGGTTAGGCGCCATGGTGGGAGCT…
IDG054-7A	anther specific	stamen-specific	0.84	1.00**	triacylglycerol lipase 2-like	ATGGCTACGAGTTTATTTCTAATGAGTTTGTTGATGCTTTTGCTTGACTCTAACCCCTGCACAGCTCTCTCATGGAGGAACAATAGTTTAGTGGATGATATTGGTATACCATGTCCAGTTTCTCCGCATCCATTTACTATGTGCAAGTCAGAGGCAGAAGCTTACGGCTATCCATGTGAAGATCACAAGGTCACAACTGAAGATGGATATATTCTTAGCTTAAAAAGGATTCCTCATGGTCATGATACTGATAACTCAACCGGGGATCAGAAGACAAGGCAACCAATACTGCTATTCCACGGGCTTTTTGTGGATGGCGTTTCTTGGCTACTGGGTACACCAGAACAATCACTTGGCTTTATTTTGGCAGATGGTGGGTTTGATGTTTGGCTAGCGAAC…
IDG054-7B	anther specific	stamen-specific	0.88	1.00**	triacylglycerol lipase 2-like	ATGGCTACGAGTTTATTTCTAATGAGTTTGTTGATGTTTATGCTTGACTCTAACCCCTGCACAGCTCTCTCATGGAGGAACAATAGTTTAGTGGATGATATTGGTATACCATGTCCAGTTTCTCCACATCCGTTTACTATGTGCAAGTCAGAGGCAGAAGCTTACGGCTATCCATGTGAAGATCACAAGGTCACAACTGAAGATGGATATATTCTTAGCTTAAAAAGGATTCCTCATGGCCATGATACTGATAACTCAACCGGGGATGAGAAGACAAGGCAACCAATACTGCTATTCCACGGGCTTTTTGTGGATGGCGTTTCTTGGCTACTGGGTACACCAGACCAATCACTTGGCTTTATTTTGGCAGACGGTGGGTTTGATGTTTGGCTAGCGAAC…
IDG054-7D	anther specific	stamen-specific	0.77	1.00**	triacylglycerol lipase 2-like	ATGGCTACGAGTTTATTTCTAATGAGTTTGTTGATGCTTTTGCTTGACTCTAACCCCTGCACAGCTCTCTCATGGAGGAACAATAGTTTAGTGGATGATATTGGTATACCATGTCCAGTTTCTCCGCATCCGTTTACTATGTGCAAGTCAGAGGCAGAAGCTTACGGCTATCCATGTGAAGATCACAAGGTCACAACTGAAGATGGATATATTCTTAGCTTAAAAAGGATTCCTCATGGCCATGATACTGATAACTCAACCGGGGATGAGAAGACAAGGCAACCAATACTGCTATTCCACGGGCTTTTTGTGGATGGCGTTTCTTGGCTACTGGGTACACCAGACCAATCACTTGGCTTTATTTTGGCAGACGGTGGGTTTGATGTTTGGCTAGCGAAC…
IDG055-7A	anther specific	stamen-specific	1	1.00**	bidirectional sugar transporter SWEET	ATGGTTTCCGCTGACGCAGCTCGCAACGTCGTCGGTATCATCGGGAATGTCATCTCCTTCGGCCTCTTCCTCTCCCCTACGCCGGTTTTCTGGCGGATCATCAAGGCCAAGGACGTGGAGGAGTTCAAGCCGGACCCCTACCTGGCGACGCTGCTCAACTGCATGCTCTGGGTCTTCTACGGCCTCCCCATCGTCCACCCCAACAGCATCCTCGTCGTCACCATCAATGGGATCGGGCTCGTCATCGAGGGATCCTACCTCATCATCTTCTTCCTCTACTCCACCAACAACAAGCGGCTGAAGATGATAGGCGTGCTCGCCGCCGAGGCGGCGTTCATGGTGGCCGTCGTGCTAGGCGTGCTCCTCGGTGCCCACACCCACGAGAAGCGCTCCATGATT…
IDG055-7B	anther specific	stamen-specific	0.96	1.00**	bidirectional sugar transporter SWEET	ATGGTTTCCGCCGACGCAGCCCGCAACGTCGTCGGTATTATCGGGAATGTCATCTCCTTCGGCCTCTTCCTCTCCCCTACGCCGGTTTTCTGGCGGATCATCAAGGCCAAGGACGTGGAGGAGTTCAAGCCGGACCCCTACCTGGCGACGCTGCTCAACTGCATGCTCTGGGTCTTCTACGGCCTCCCCATCGTCCATCCCAACAGCATCCTCGTCGTCACCATCAACGGGATCGGGCTCGTCATCGAGGGCTCCTACCTCATCATCTTCTTCCTCTACTCCACCAACAACAAGCGGCTGAAGATGATAGGCGTGCTCGCCGCCGAGGCGGGGTTCATGGTGGCCGTCGTGCTCGGCGTGCTCCTCGGTGCCCACACCCACGAGAAGCGCTCCATGATC…
IDG055-7D	anther specific	stamen-specific	1	1.00**	bidirectional sugar transporter SWEET	ATGGTGTCCGCCGACGCAGCTCGCAACGTCGTCGGTATCATCGGGAATGTCATCTCCTTCGGCCTCTTCCTCTCCCCTACGCCGGTTTTCTGGCGGATCATCAAGGCCAAGGACGTGGAGGAGTTCAAGCCGGACCCCTACCTGGCGACGCTGCTCAACTGCATGCTCTGGGTCTTCTACGGCCTCCCCATCGTCCACCCCAACAGCATCCTCGTCGTCACCATCAACGGGATCGGGCTCGTCATCGAGGGCTCCTACCTCATCATCTTCTTCCTCTACTCCACCAACAACAAGCGGCTGAAGATGATAGGCGTGCTCGCCGCCGAGGCGGCGTTCATGGTGGCCGTCGTGCTCGGCGTGCTCCTCGGTGCCCACACCCACGAGAAGCGCTCCATGATC…
IDG056-7A	spike specific, anther predominant	stamen specific	1.00**	1.00**	RAFTIN1 protein/BURP domain protein-like	ATGGCGCGCTTCCTCGTCGCCCTCCTCGCCACCACCCTGGTCGCGGTTCAGGCTGGAGGGCAGCTGGGCCACGCGGCGCCGGCGACGGCGGAGGTGTTCTGGCGCGCCGTGCTGCCACACTCGCCATTGCCCGACGCCGTTCTCCGCCTTCTCAAACAACCCGCAGCAGGTGTTGAACTGCTCACAGAAGCCACCAGCTTCGTGAGGGATGCCGAGGACAGGCCCCCCTTCGACTACCGTGATTACAGCCGCTCGCCGCCCGATGATGAACCGAGCAAGAGCACCGGCGCCGCCTCCGGGGCGCGGGACTTCGACTACGACGACTACAGCGGGGGCGACAAGCTCCGTGGCGCCGCCTCCGGGGCGCGGGACTTCGACTACGACGACTACAGCGGGGCC…
IDG056-7B	spike specific, anther predominant	stamen specific	0.98**	1.00**	RAFTIN1 protein/BURP domain protein-like	ATGGCGCGCTTCCTCGTCGCCCTCCTCGCTGCCACCCTGGTCGCGGTTCAGGCTGGAGGGCAGCTGGGCCACGCGGCGCCGGCGACGGGGGAGGTGTTCTGGCGCGCCGTGCTGCCGCACTCGCCATTGCCCGACGCCGTTCTCCGCCTCCTCAAACAACCTGCAGCAGAATCCACCAGCTTCGTGAGAGACCCCGAGGACAGGCCCCCCTTCGACTACCGTGATTACAGCCGCTCGTCGTCCGATGATGAACCGAGCAAGAGCACCGTCGCCGCCTCCGGAGCGGGGGGCTTCGACTACGACAACTACAGCGGGGCCGACGAACGTCGTGGTGCCACCGATGAATACAAGGCGCCGAGCAGCAGCCTCGCTGGAAGCGGGGCGTACATGGCTAGGGGC…
IDG056-7D	spike specific, anther predominant	stamen specific	1.00**	1.00**	RAFTIN1 protein/BURP domain protein-like	ATGGCGCGCTTCCTCGTCGCCCTCCTCGCTGCCACCCTGGTCGCGGTTCAGGCTGGAGGGCAGCTGGGCCACGCAGCGCCGGCGACGGCGGAGGTGTTCTGGCGCGCCGTGCTGCCGCACTCGCCATTGCCCGACGCCGTTCTCCGCCTCCTCAAACAACCTGCAGCAGAAGCCACCAGCTTCGTAAGAGACCCCGAGGACAGGCCCCCCTTCGACTACCGTGATTACAGCCGCTCGTCGTCCGATGATGAACCAAGCAAGCGCACCGGCGCCGCCTCCGGAGCGGGGGGCTTCGACTACGACAACTACAGCGGCGCCGACGAACGCCGTGGCGCCACCGATGAATACAAGGCGCCGAGCAGCAGCCCCGCTGGAAGCGGGGCGTCCATGGCTAGGGGC…
IDG057-7A	anther specific	stamen specific	1.00**	1.00**	acyltransferase-like protein	ATGCTTCCTAAAGCCTCCCTTGAAACCAGGACTGGGACACTCAAAAAAGCTTCACAGCTCAATGCAGCAATGGCGACTCTTTCTCTCCCTGTGGCACACCCGCAGGTCTCCCTCTGGCGACAAGGGCGGCGGCGACTGCATGGCTTGCCAAGCTGCCAGTTCAGACACGCCGGGAGAGTGCAATCCAGCTACAGGGGACTCGAAGCTCTGTATGATGATGGGTACGGGACGGTCAAGGACCTGGACTACTTCTATCAGGCACTTGGGCAGCTGGTTGAGCATGACAGTGGGCCGCCCTGCTGGTTATGCCCCGTCGACGCCGGCTCGACAGTCGAGGATGCTCCGCTCATGCTGTATTTGCCAGGGGTAGATGGAATGGGGATGGGGCTCTGCATGCAC…
IDG057-7D	anther specific	stamen specific	1.00**	1.00**	acyltransferase-like protein	ATGCTTCCTAAAGCCTCCCTTGAAATCAGGACTGGGATACTCAAAAAAGCTTCGCAGCTCAATGCAGCAATGGCGACTCTTTCTCTCCCTCTGGTACACCCGCAGGTCTCCCTCTGGCGACAAGGGCCGCGGCGACTGCATGGCTCGCCAAGCTGCCAGTTCAGACACGCCGGGAGGGTGCAATCCAGTTACAGAGGGCTTGAAGCTCTGTATGATGATGGGTACGGGACAGTCAAGGACCTGGACTACTTCTATCAGGCACTCGGGCAGCTGGTTGAGCATGACAGTGGGCCGCCCTGCTGGTTATGCCCCGTCGACGCCGGCTCGACAGTCGAGGATGCTCCGCTCATGCTGTATTTGCCAGGGGTGGATGGAATGGGGATGGGGCTCTGCATGCAC…
IDG058-7B	spike predominant	stamen and pistil-predominant	-0.03	0.50**	heat shock protein	ATGGCCTCCGCCGTCGTTTGCAAGGGCGAGGGTGCCGCGCCAGCGGCCAGCCTCCTCAAGTCCGGTGCTCCCGTGGCCTTCTCCGCGCTCCACTCCCCCGCCGTCGCCGCCGCCCGCCGCCCGTACAACACCCGGGTCAAGGAGGTCAGCCGCTACGACGACGACAAGGACGACGACCGCGACCTCGTCATCCCCAGCTTCTTCTCGCAGGACGTGCTCGACCCGCTCGGCGCGCAGACCAGCATGGCCCGTCTGCTGTCTCTGATGGAGGACGTCGCATCTCAGACCGGCGGCCTCTCCTCCACTGCTGGTGCTGGGGCGTCGCGGCTGGGACGCTGGGTGGCCAAGGAGGACGACGACGCGGTGTACCTCAAGGTGCCGATGCCGGGGCTGACCAAG…
IDG059-7D	spike predominant	stamen-predominant	0.44**	0.65**	acyl carrier protein	ATGGCTTCCATCGCCGGATCTGCCGTGTCCTTCGCCAAGCCCGTCAAGGCAATCAACACGAACTCGCTCTCTTTCTCTGGTCCAAGGAGGGGCAATGCATTTCTTCGCCTGCAGCCAGTGCCGATGAGATTTGCTGTTTGCTGCTCAGCAAAGCAGGATACAGTGGAGAAGGTTTGTGAAATTGTTAAGAAGCAGCTTGCTGTTCCTGAAGGCACTGAAGTTTGCGGTACCACCAAGTTCTCTGACCTTGGAGCTGATTCACTGGACACGGTCGAGATTGTGATGGGCCTCGAGGAGGAGTTCCAGATCAGTGTGGAGGAGACGAGTGCGCAGGCAATTGCGACAGTTGAAGATGCTGCCACGCTCATCGACAAGCTTGTCTCTGCGAAGTCATCTTGA
